# Supplementary material
Source: publisher figshare collection journal article supplement (https://acs.figshare.com/ndownloader/files/4009735)

## Supporting Information

# Copper-Catalyzed Methyl Esterification Reactions *via* C-C Bond Cleavage

Yan Zhu, Hong Yan, Linhua Lu, Guangwei Rong, Defu Liu and Jincheng Mao\*

*Key Laboratory of Organic Synthesis of Jiangsu Province, College of Chemistry, Chemical*

*Engineering and Materials Science*

*Soochow University, Suzhou 215123, P. R. China*

*Fax: (+86)512-6588-0403*

*E-mail: jcmiao@suda.edu.cn*

### Table of contents

Copy of  $^1\text{H}$  and  $^{13}\text{C}$  NMR Spectra for desired products-----S2-S39

# Copy of $^1\text{H}$ and $^{13}\text{C}$ NMR Spectra for desired products:

2a:

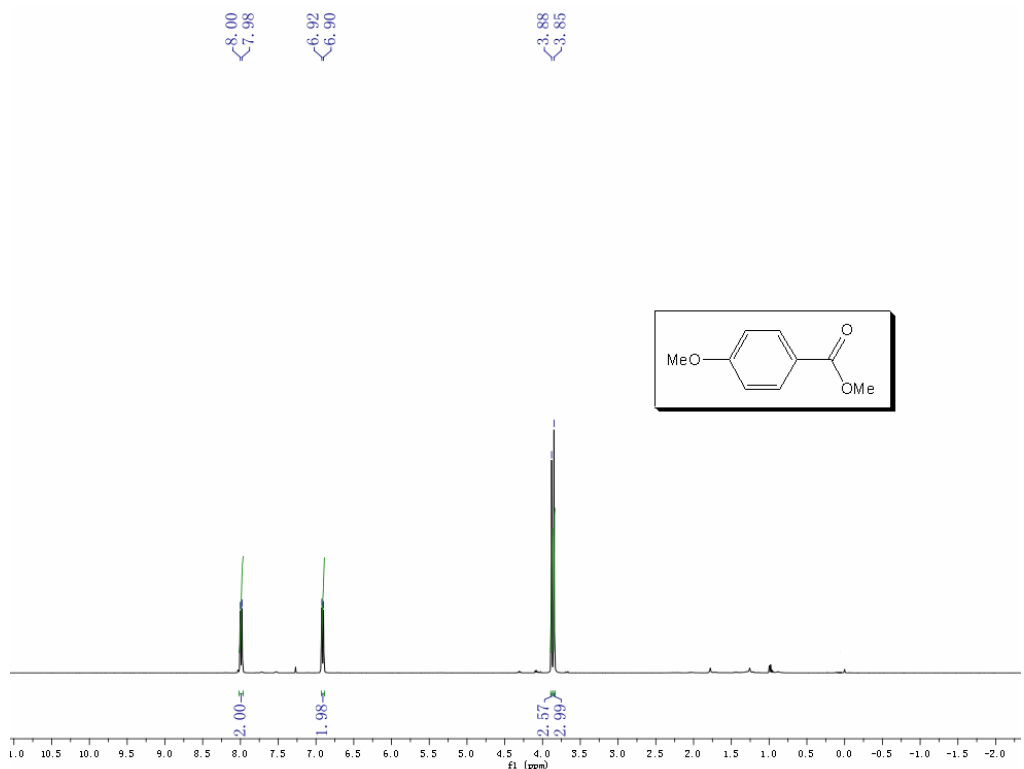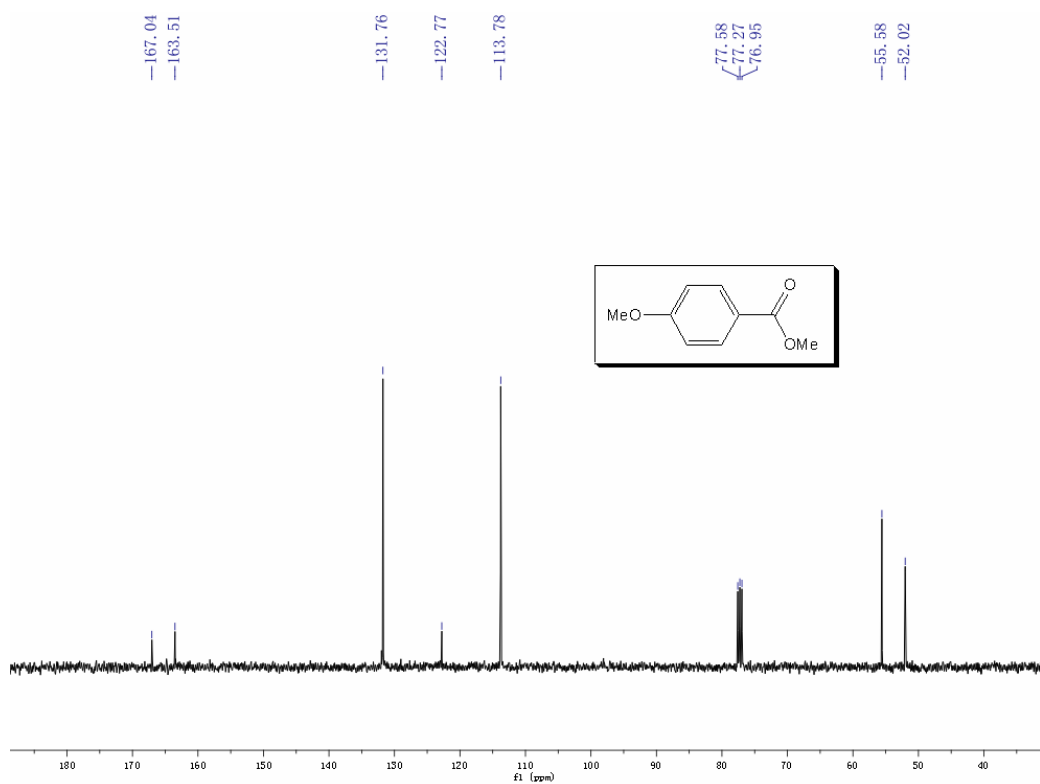

2b:

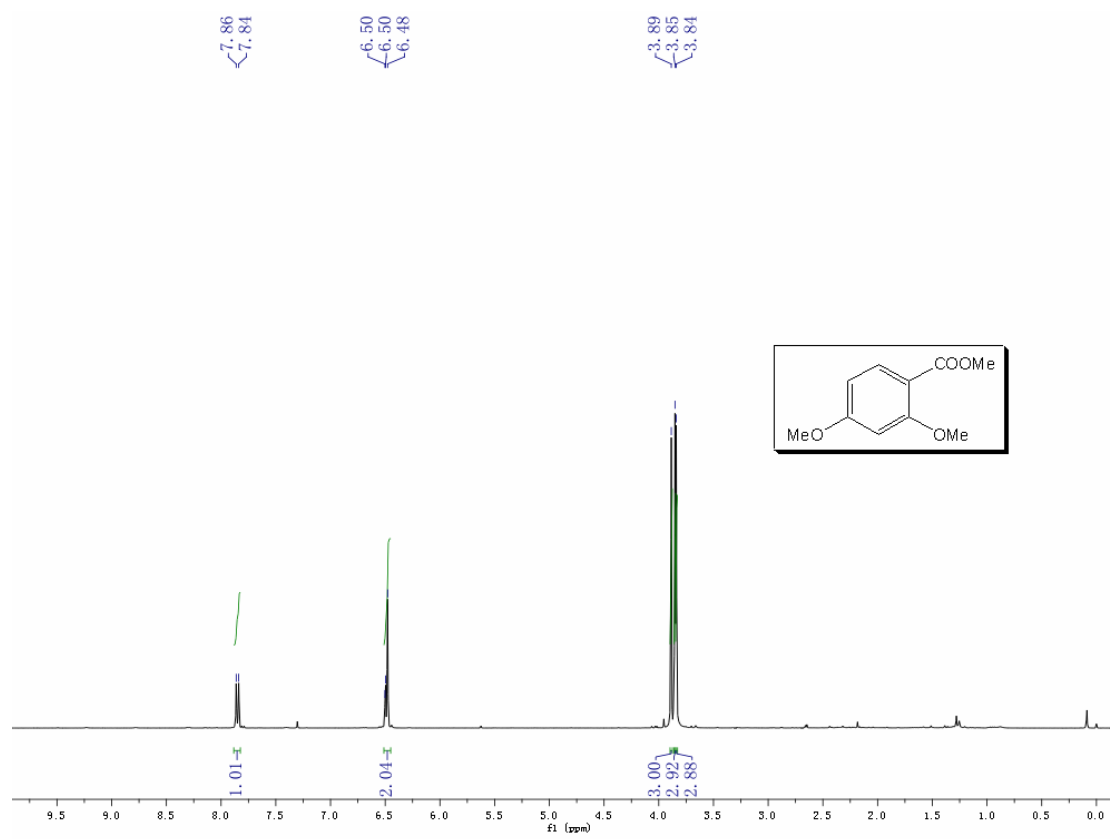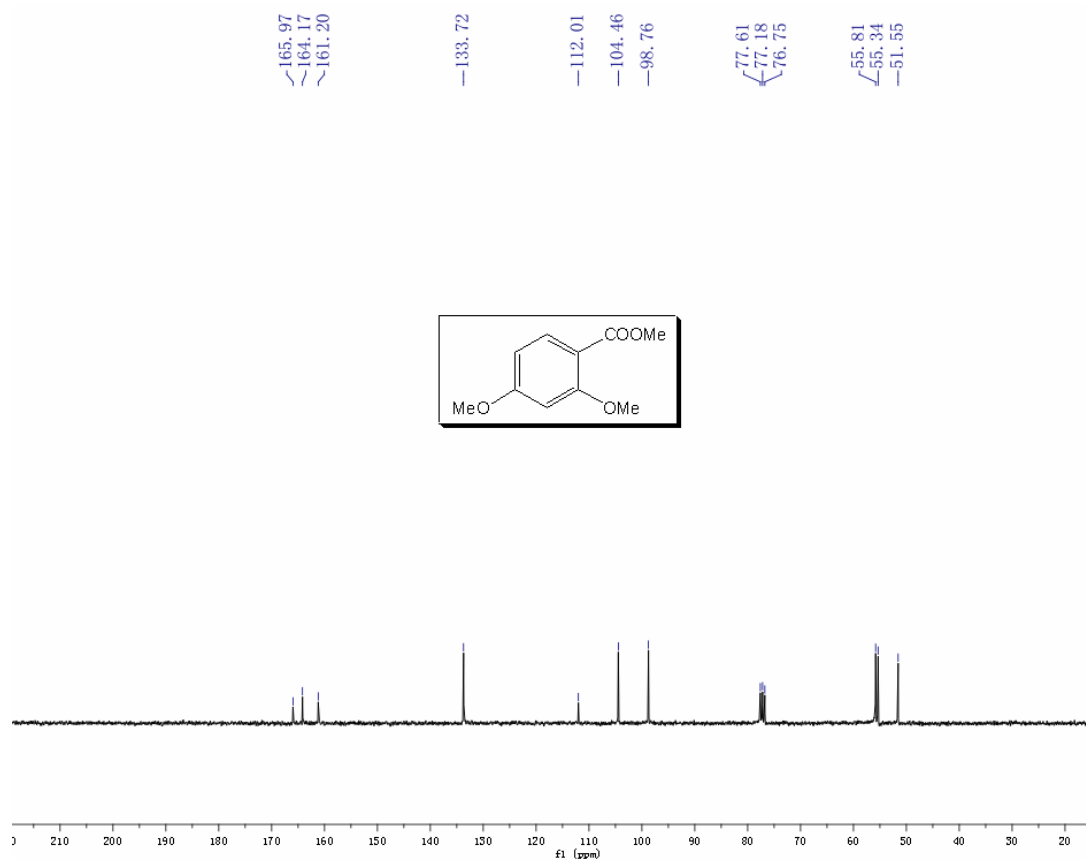

2c:

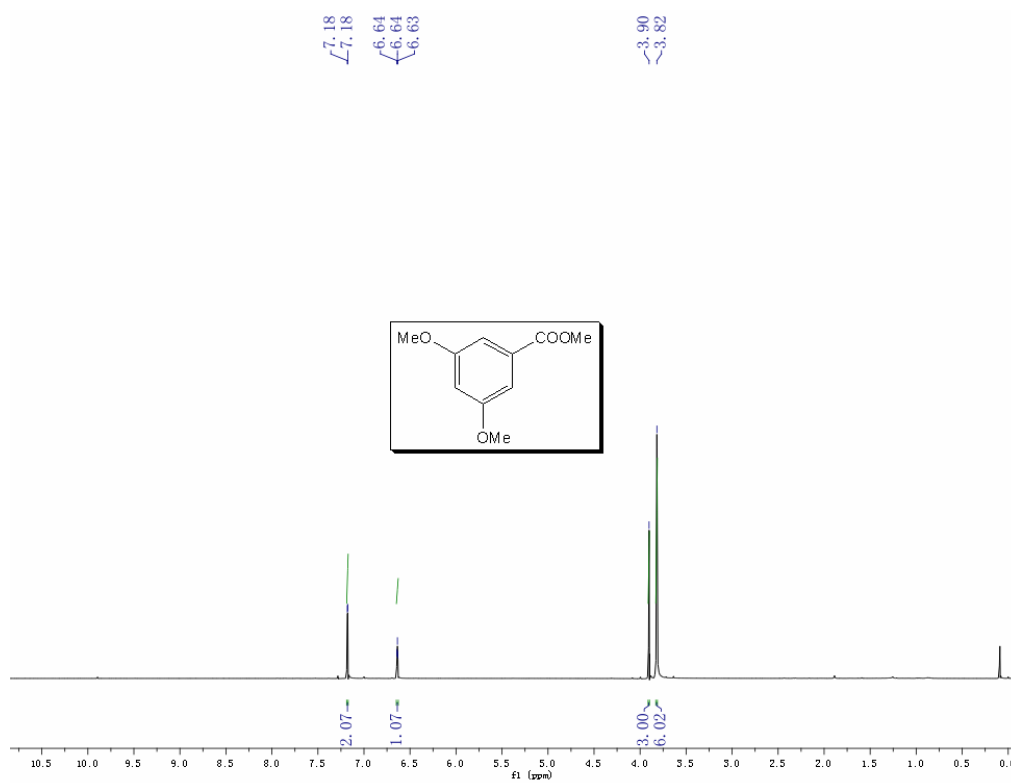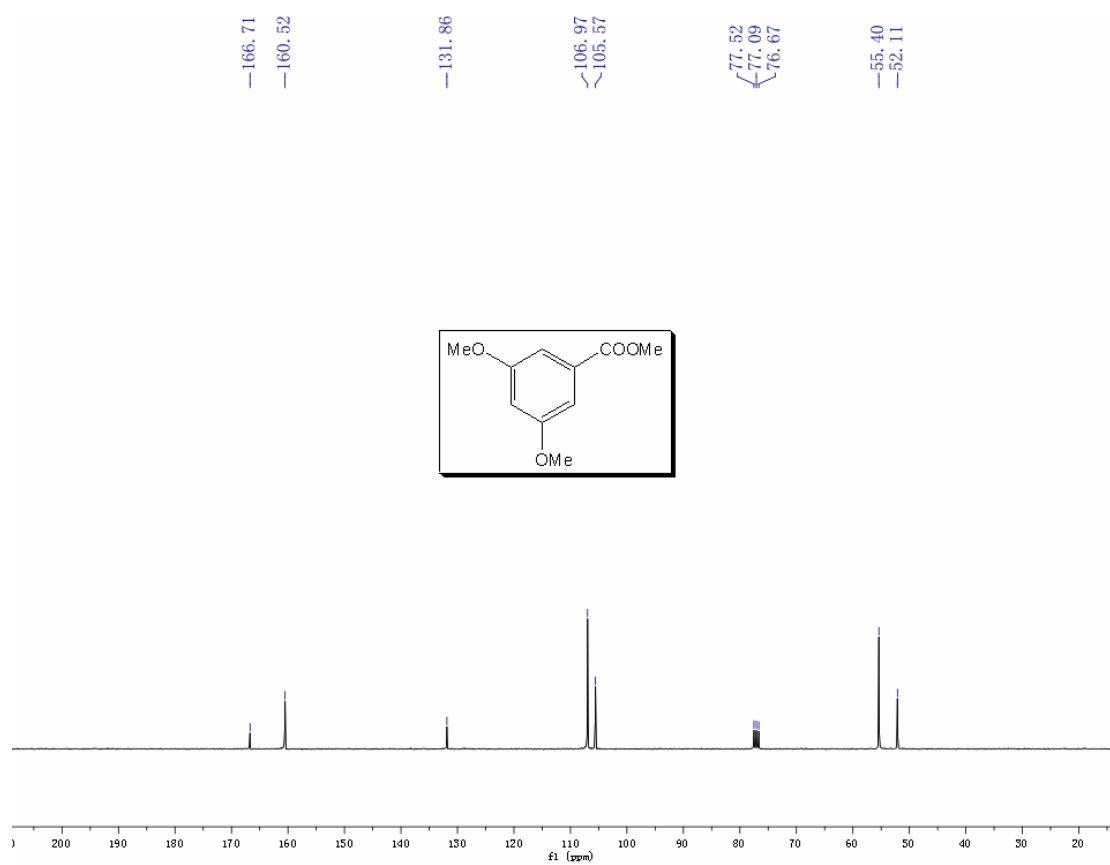

2d:

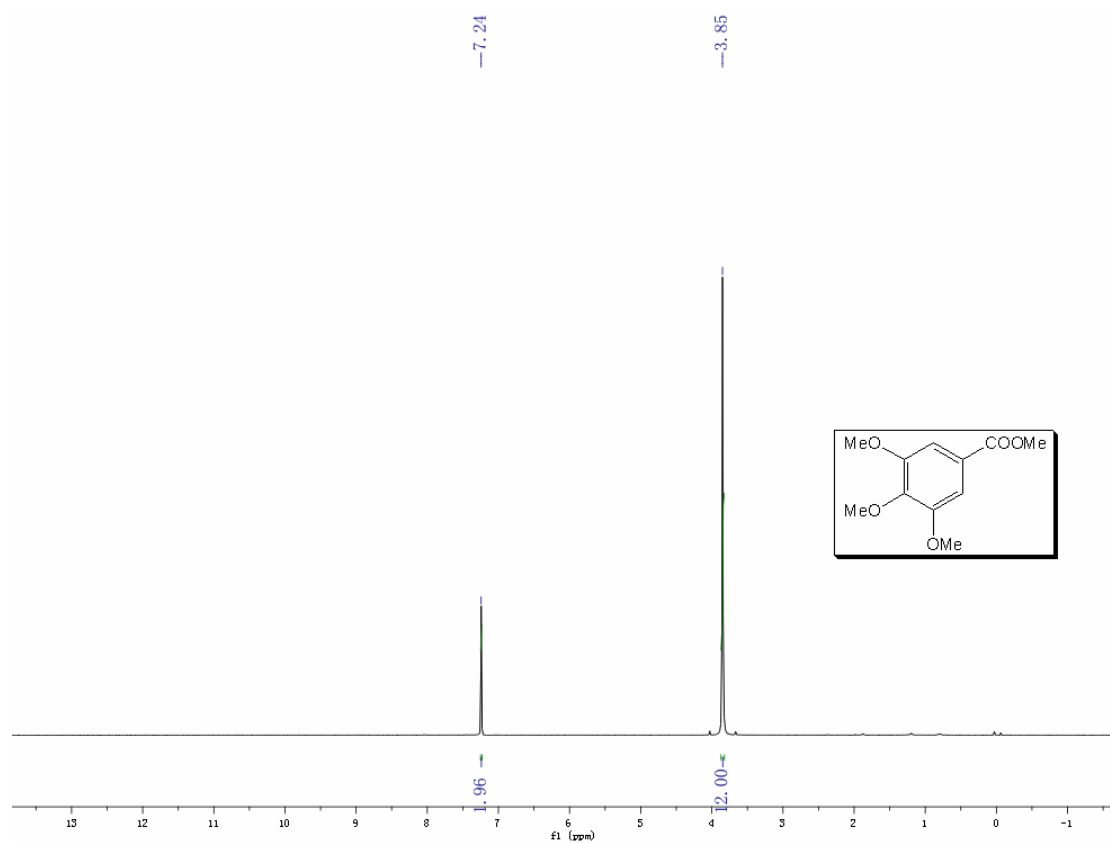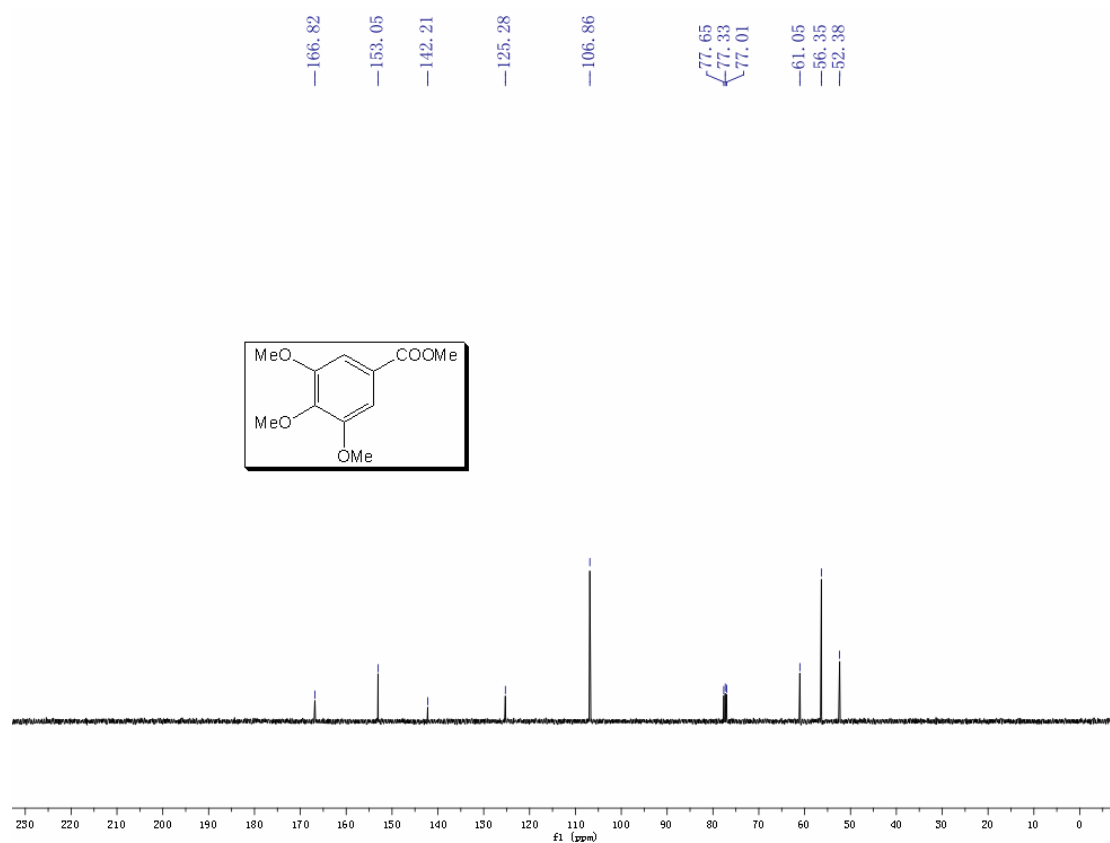

2e:

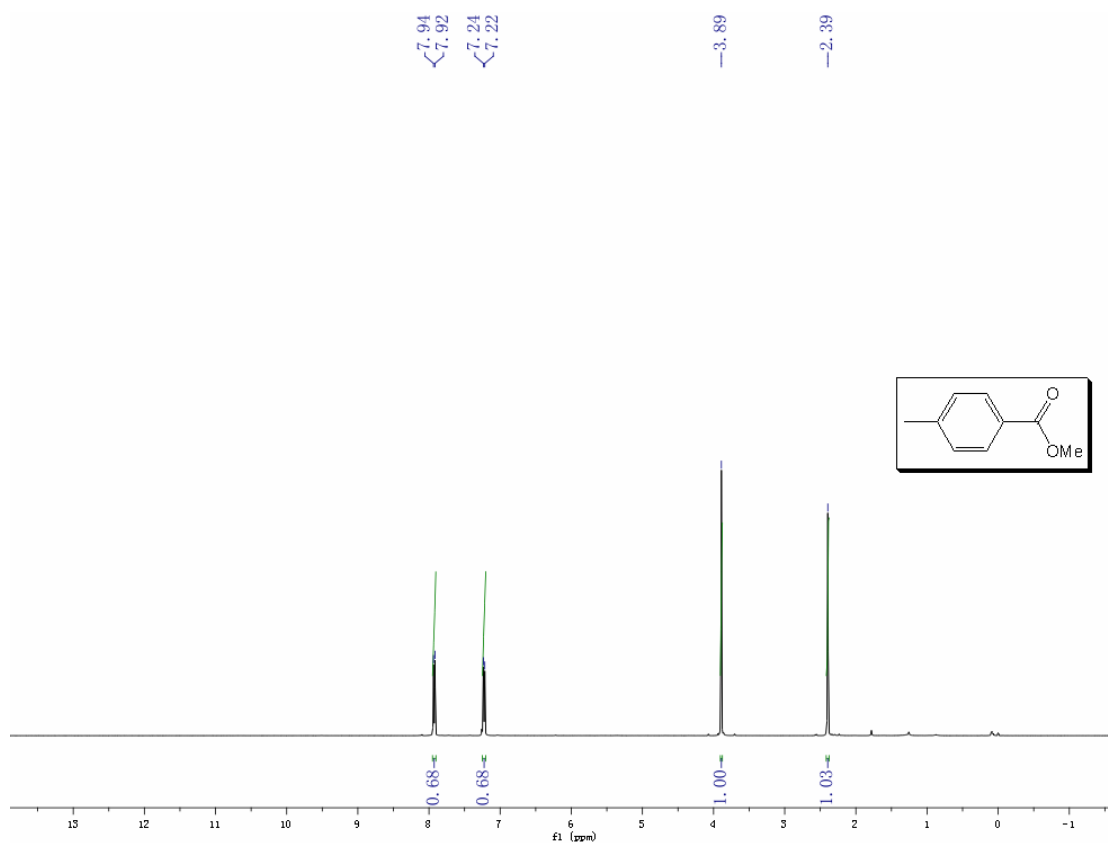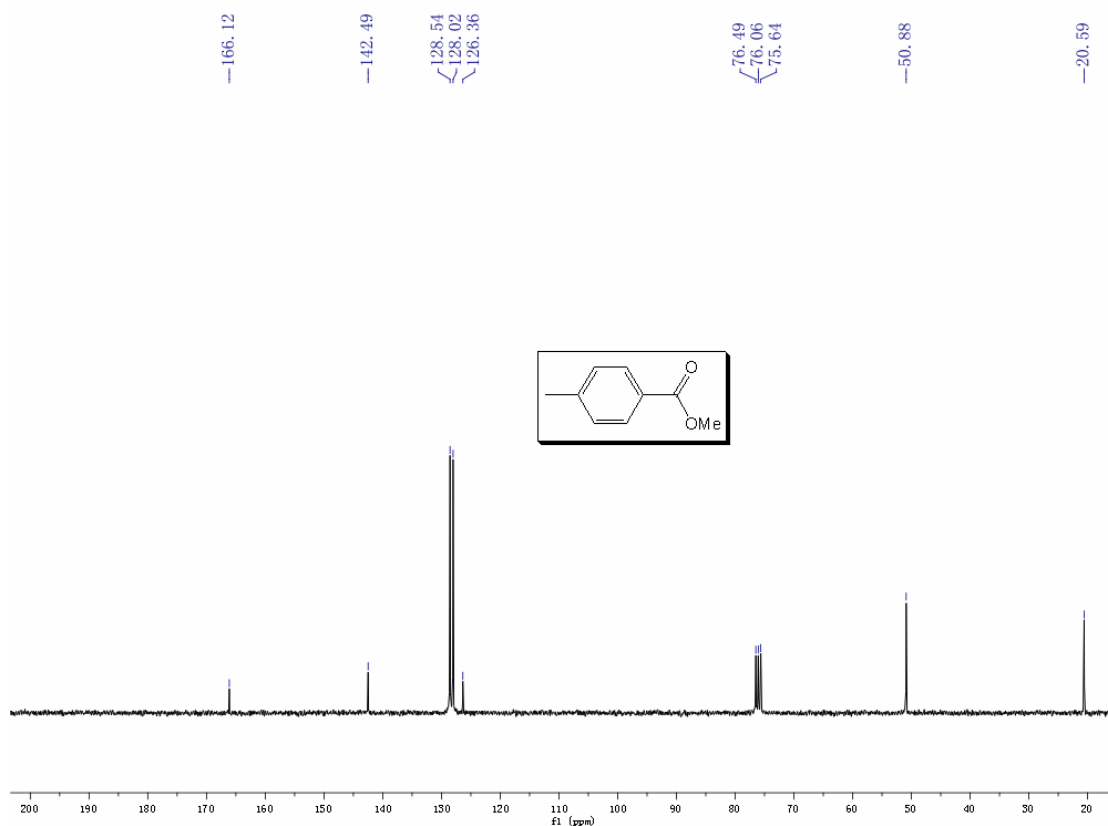

2f:

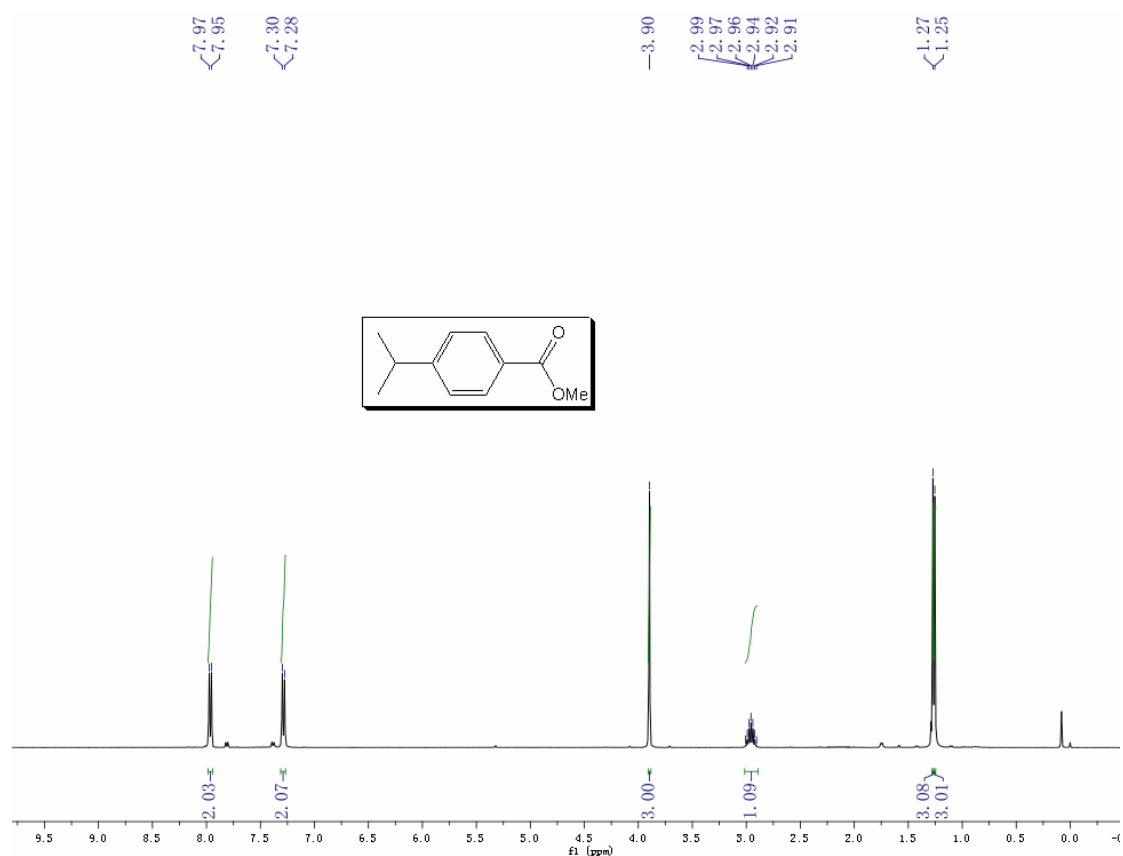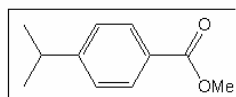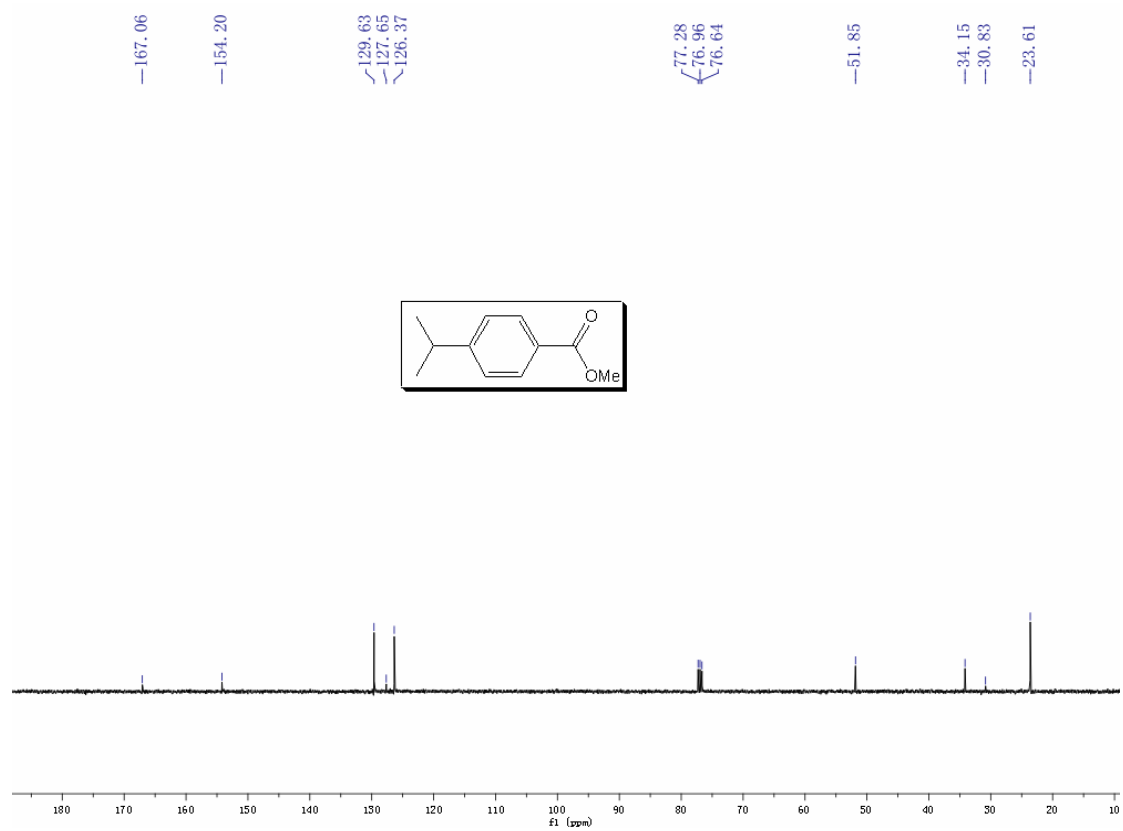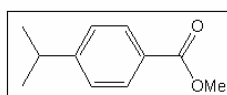

2g:

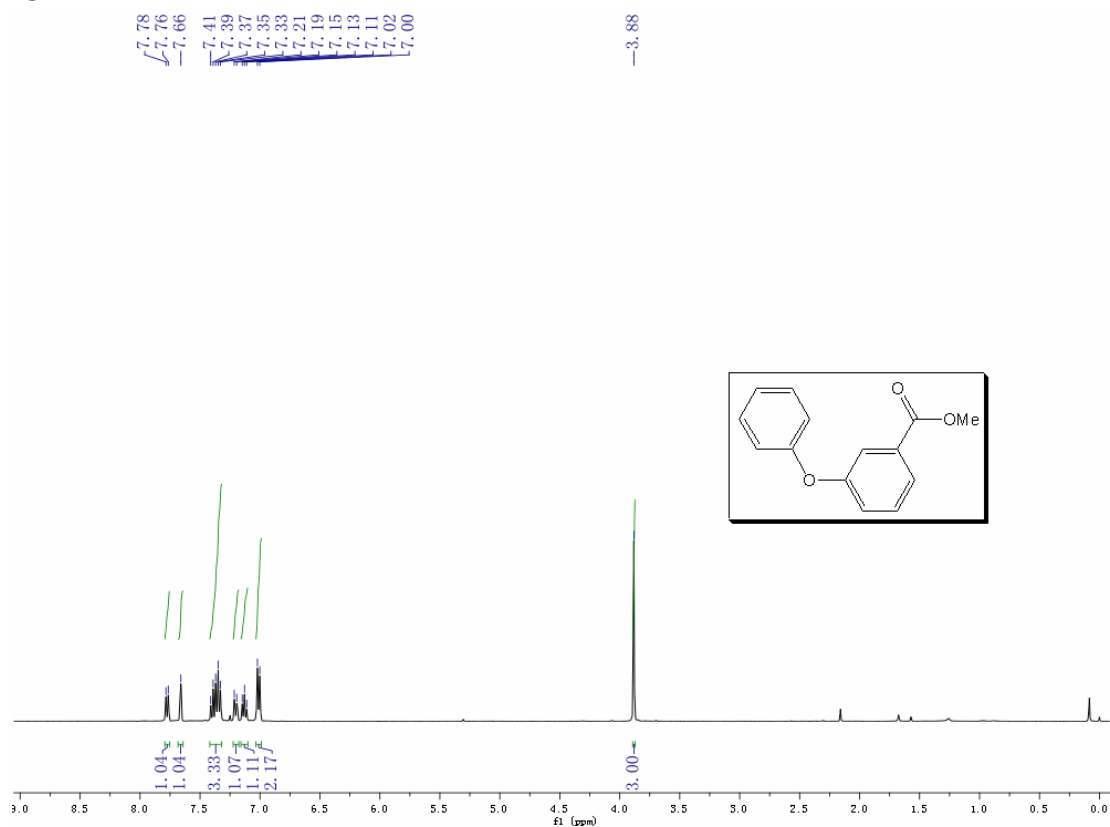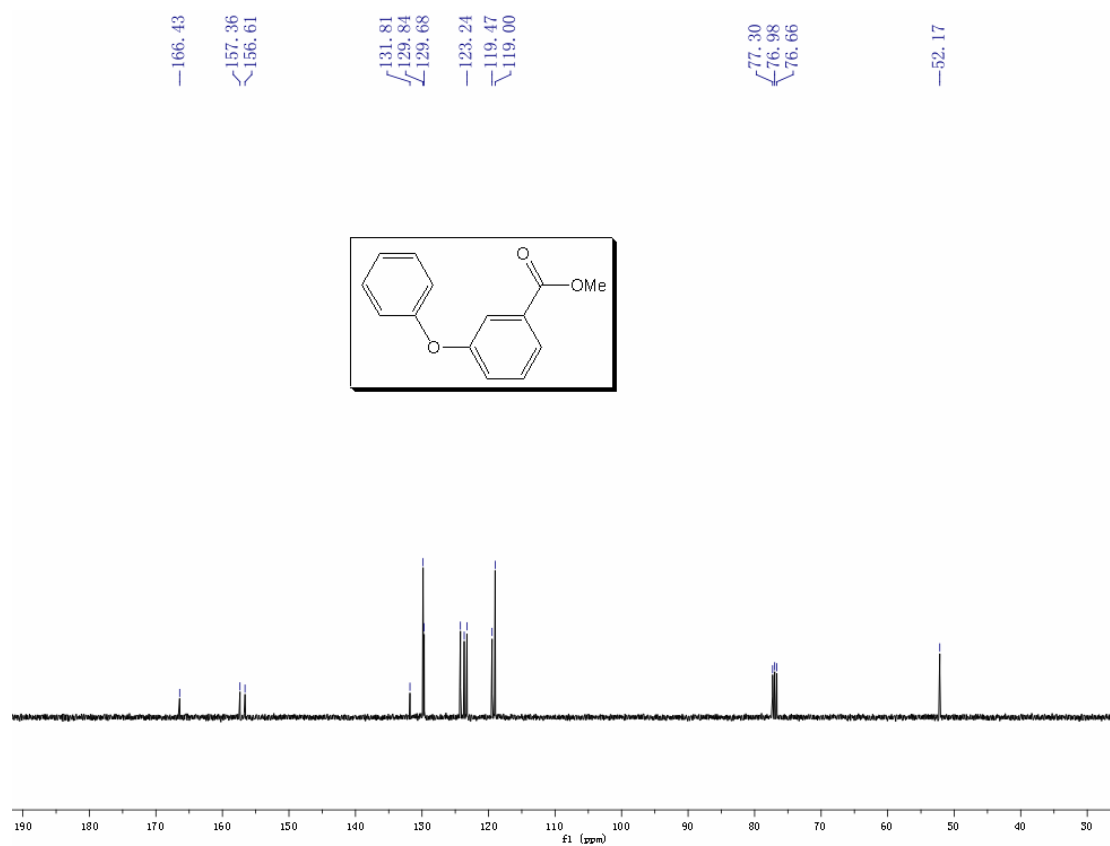



2h:

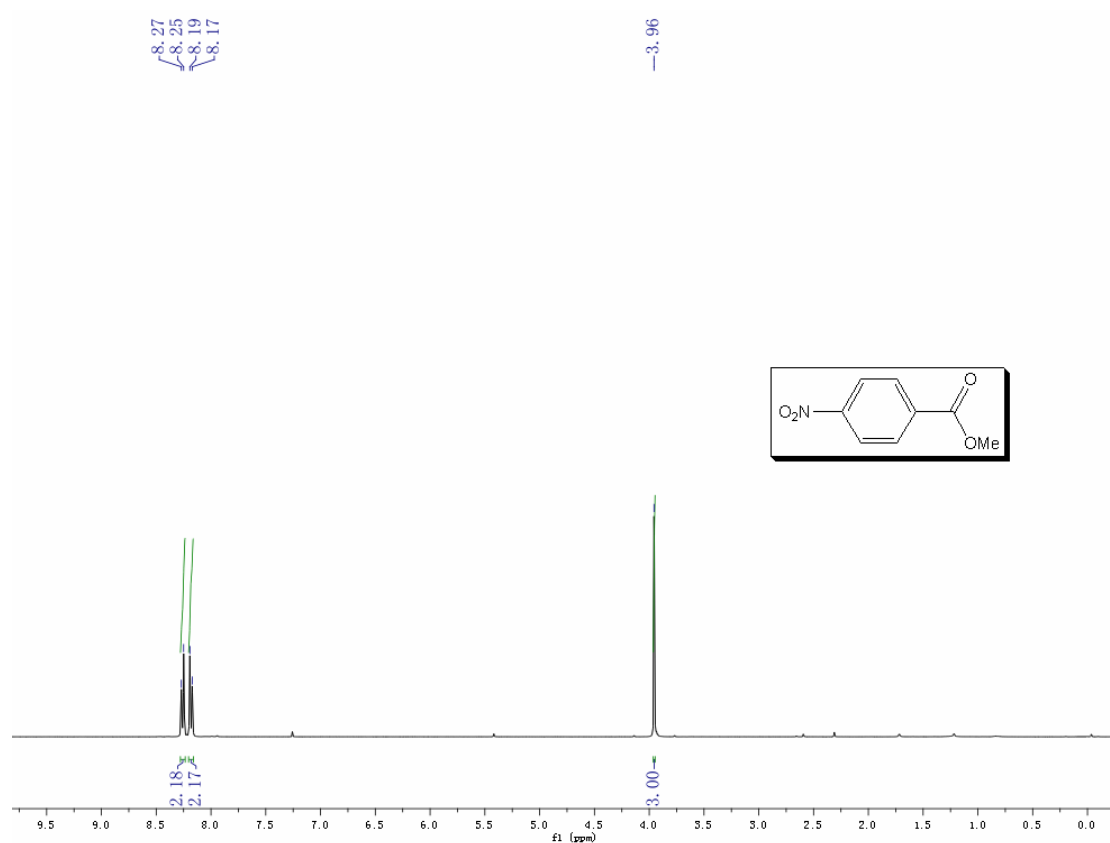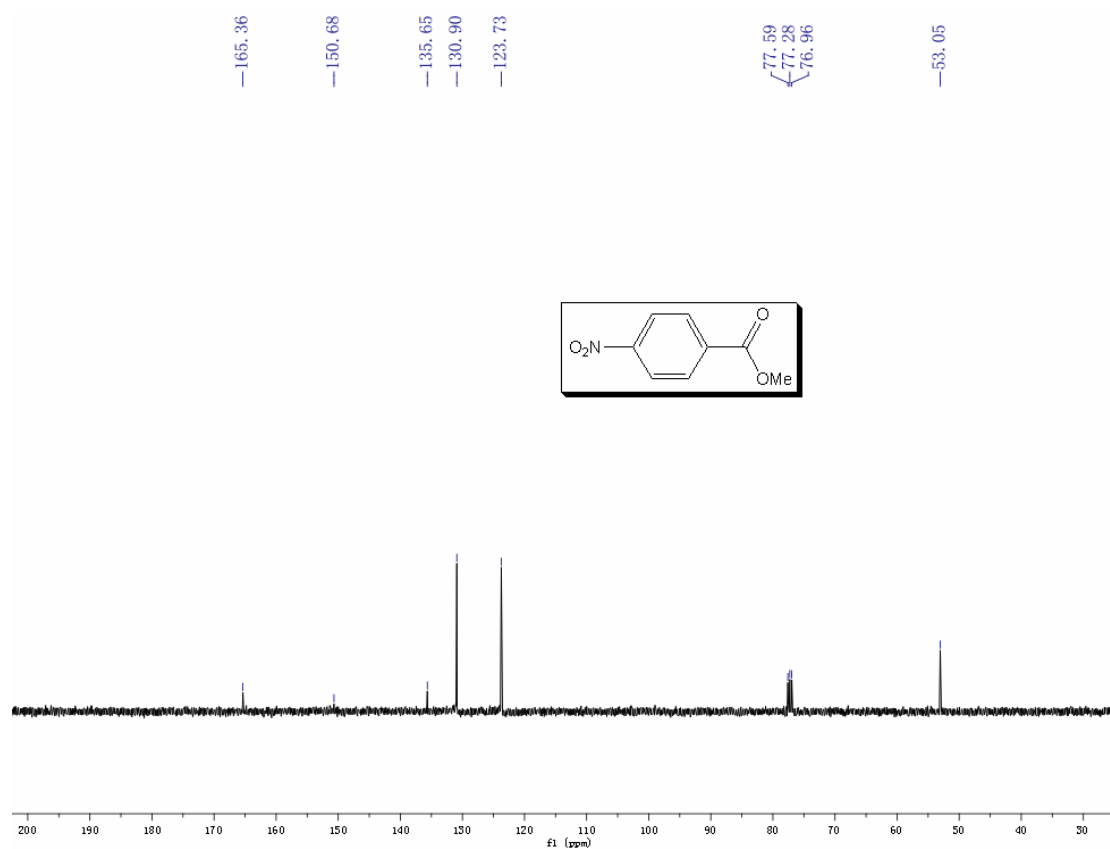

4a:

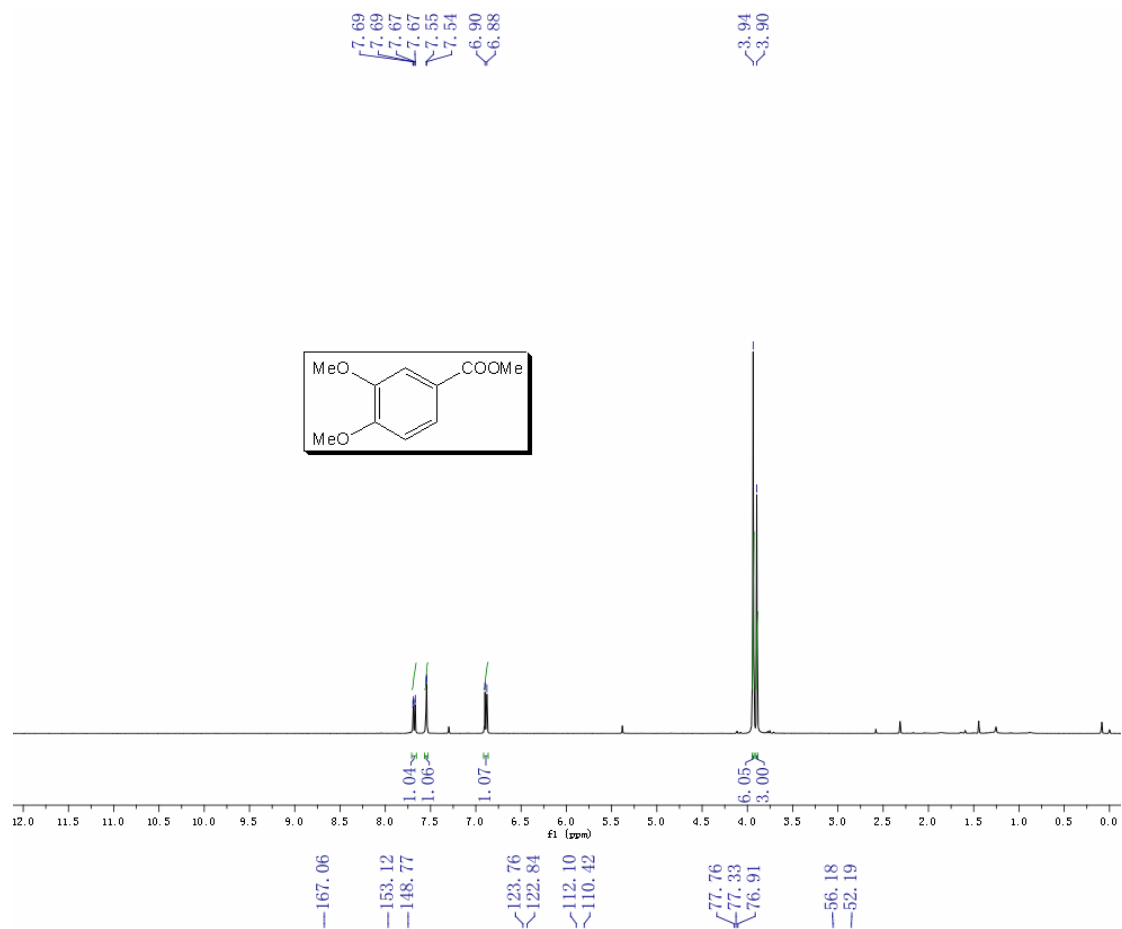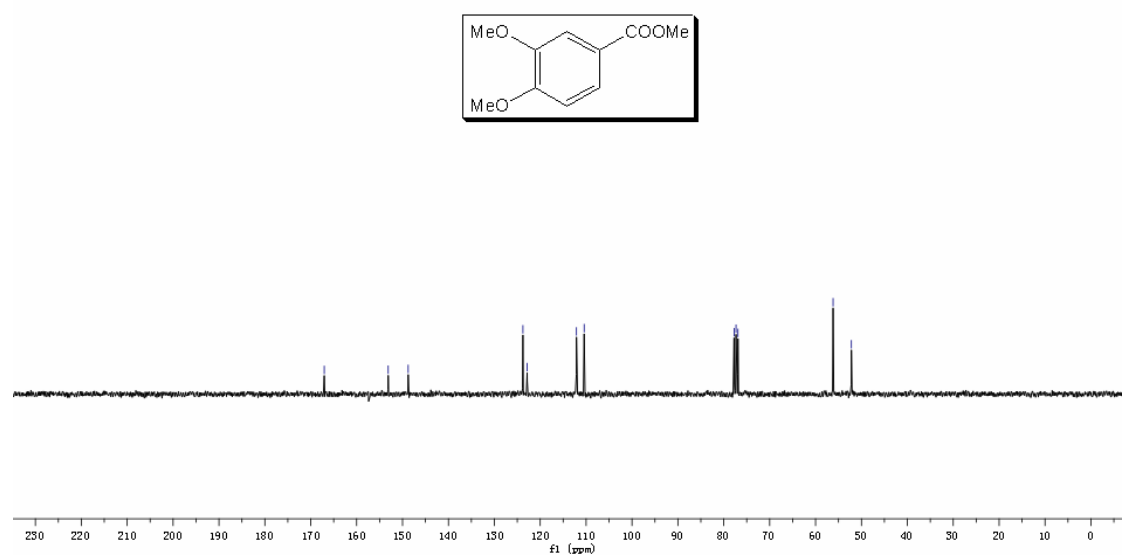

4b:

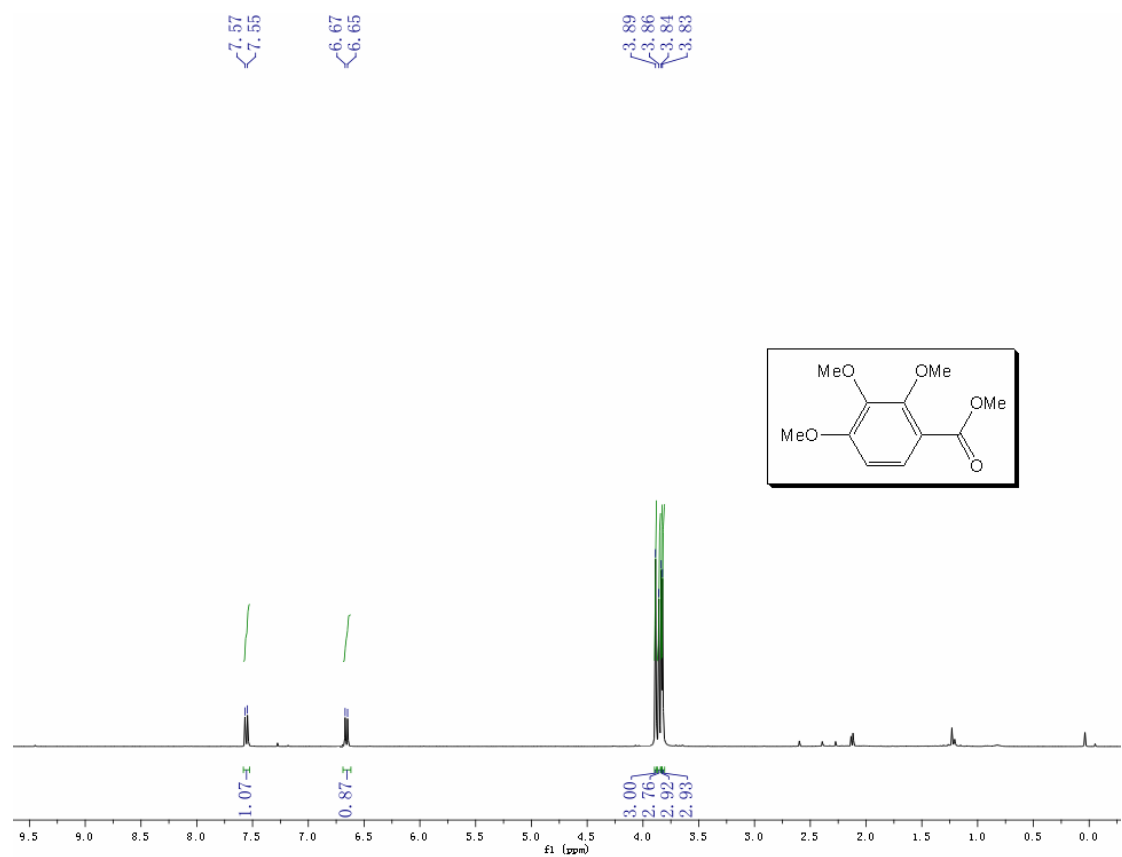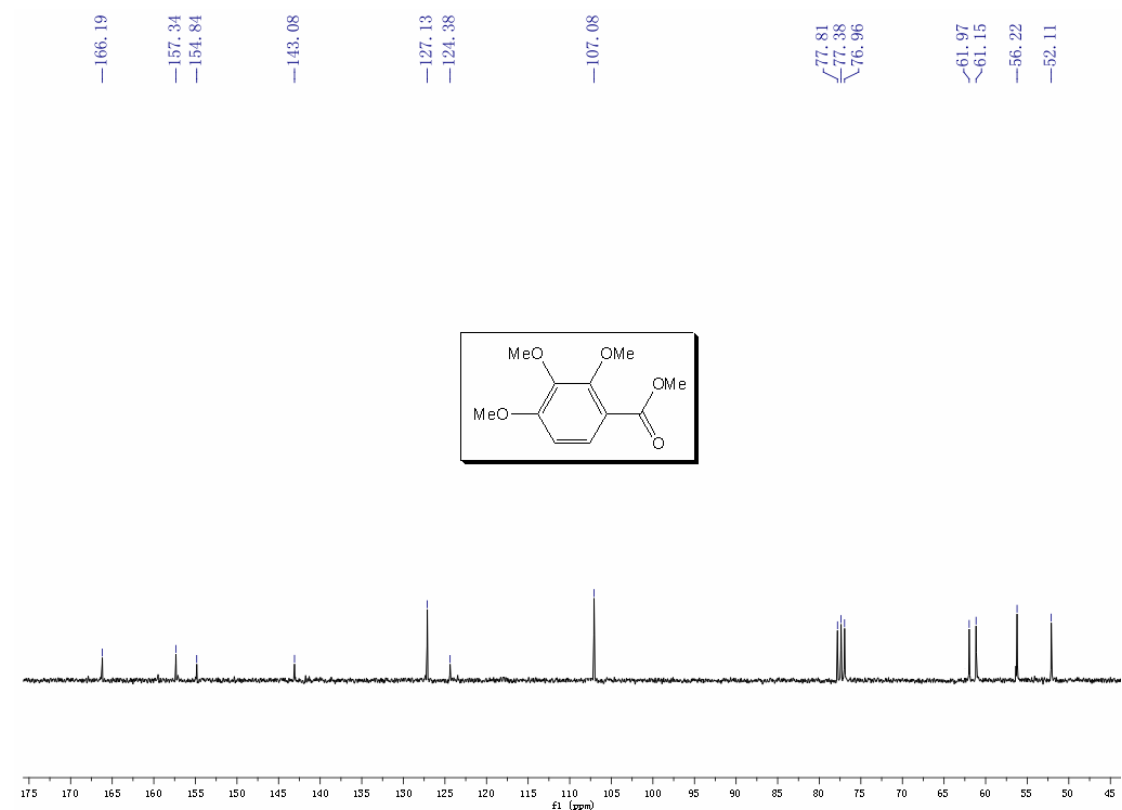

4c:

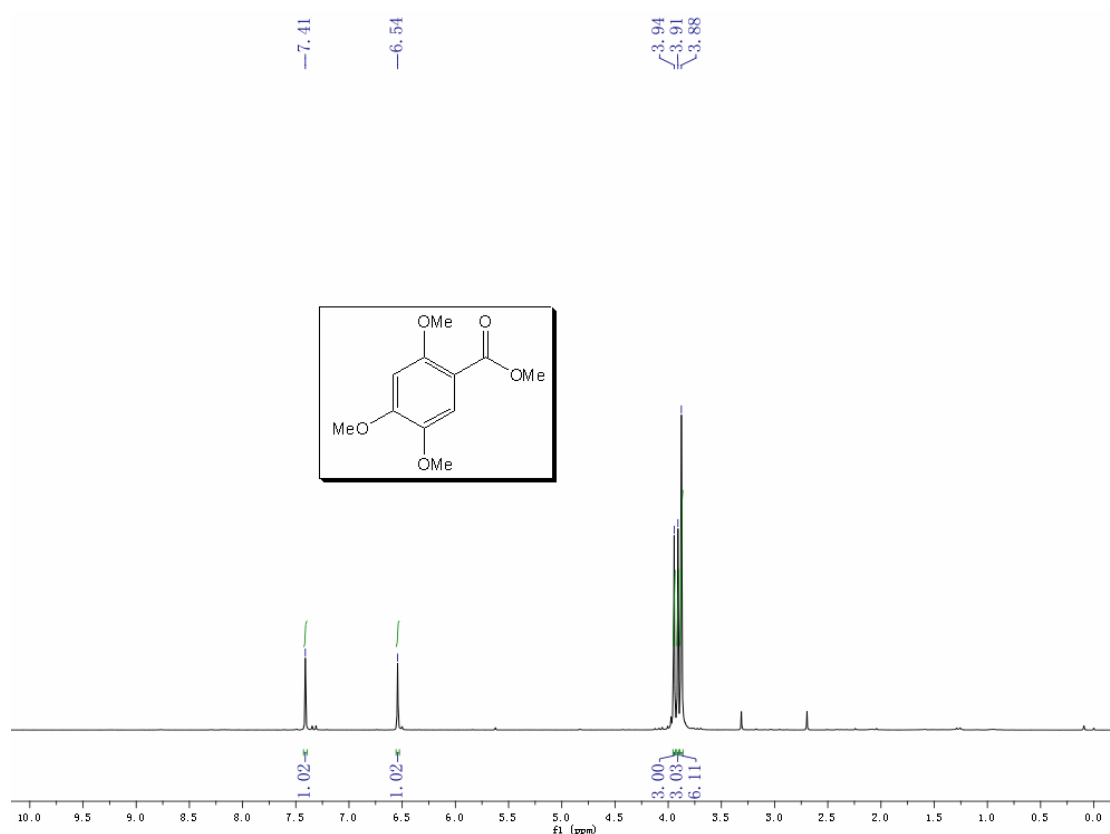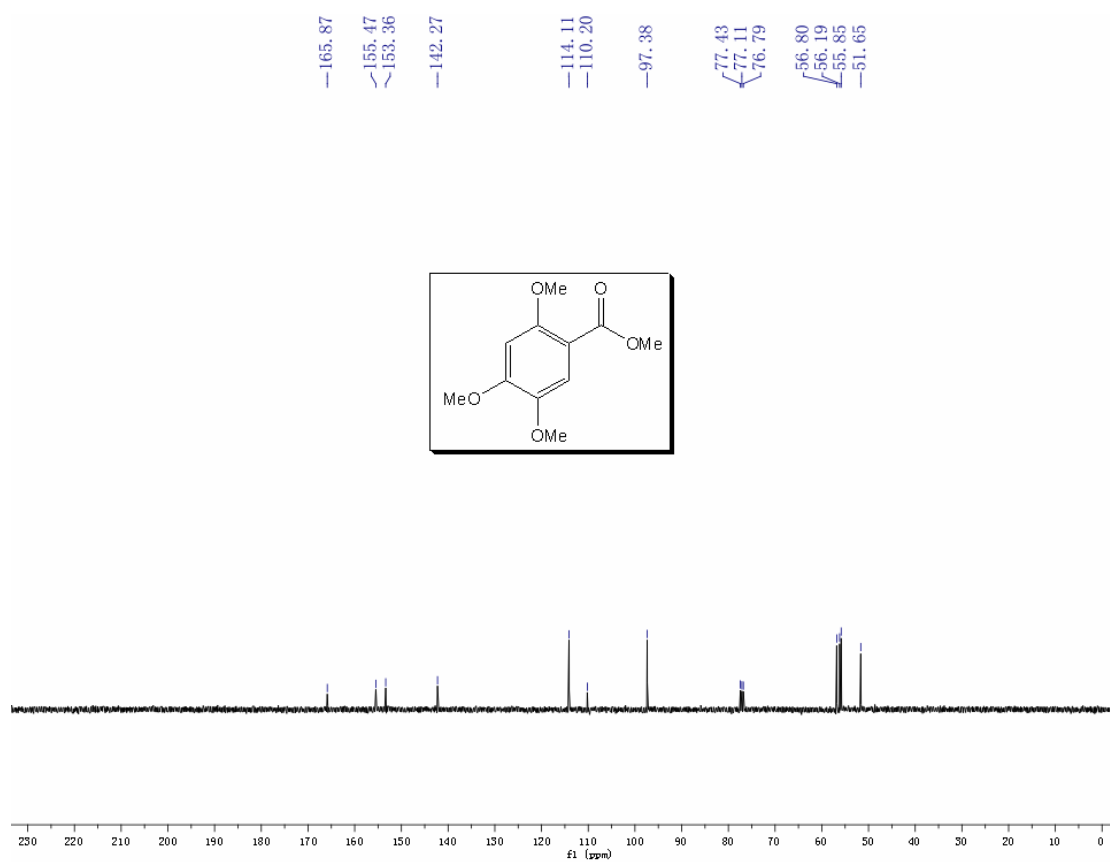

4d:

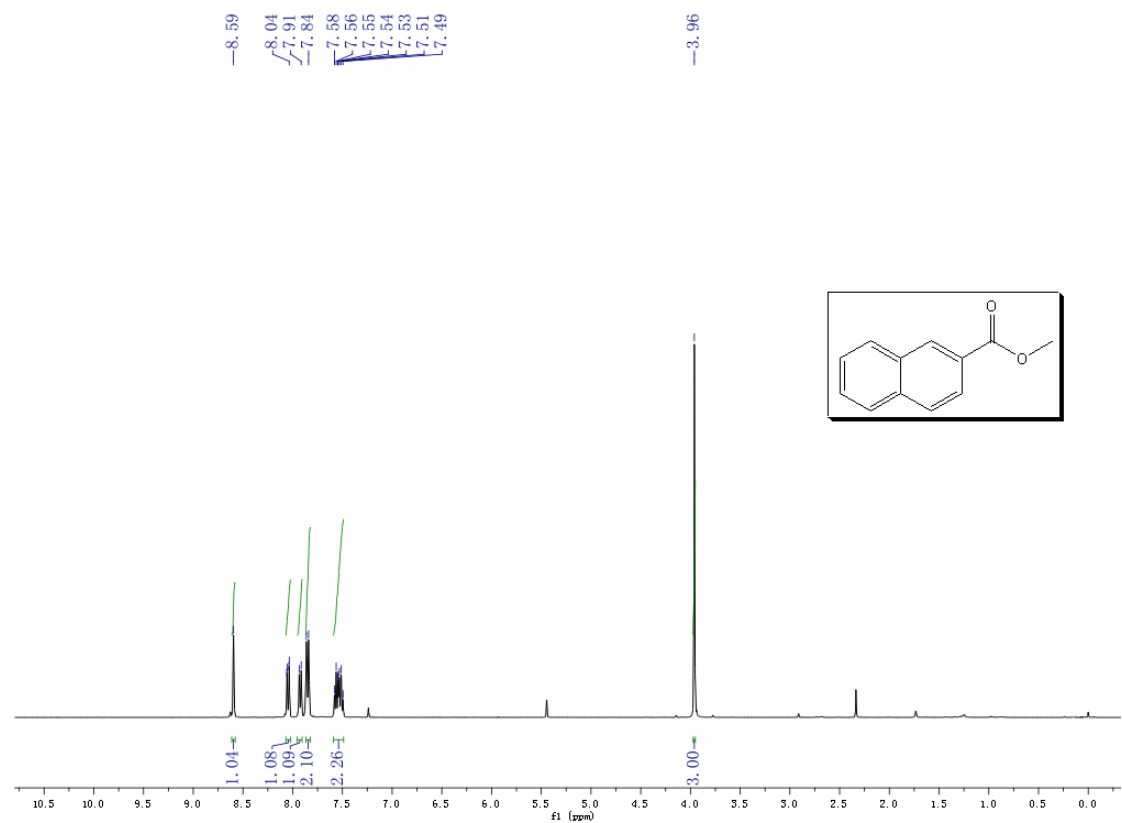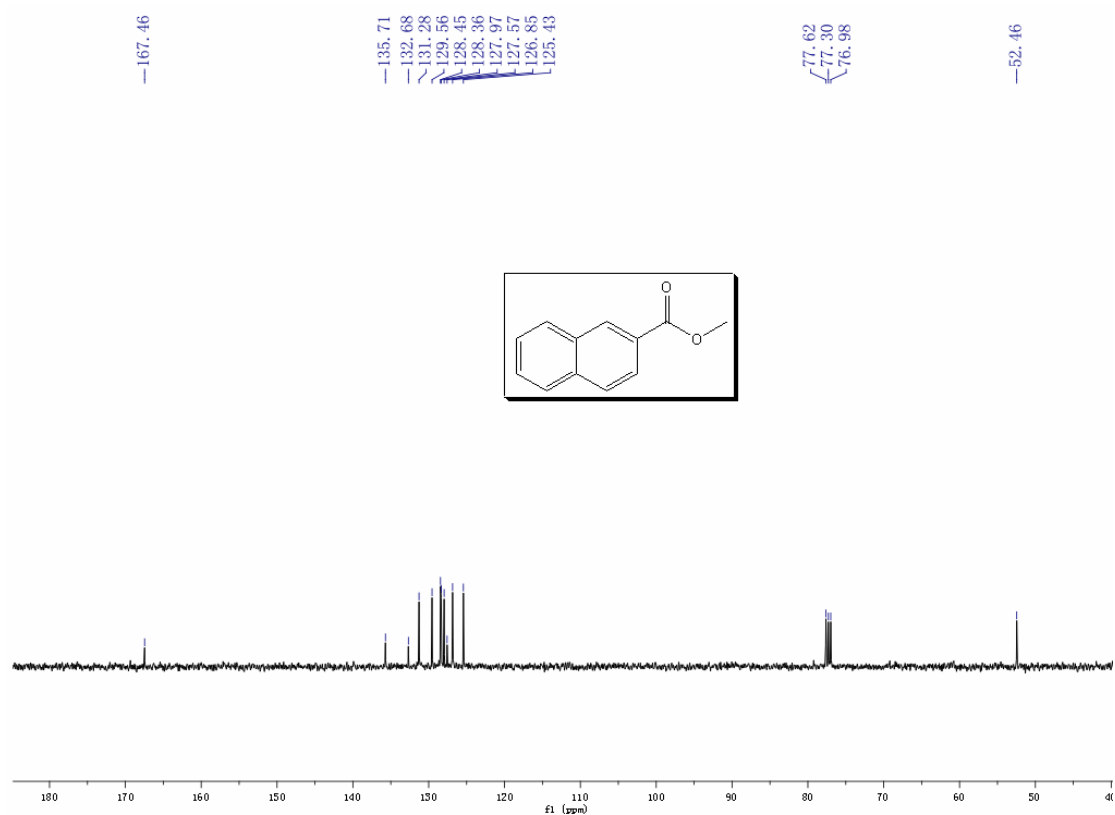

4e:

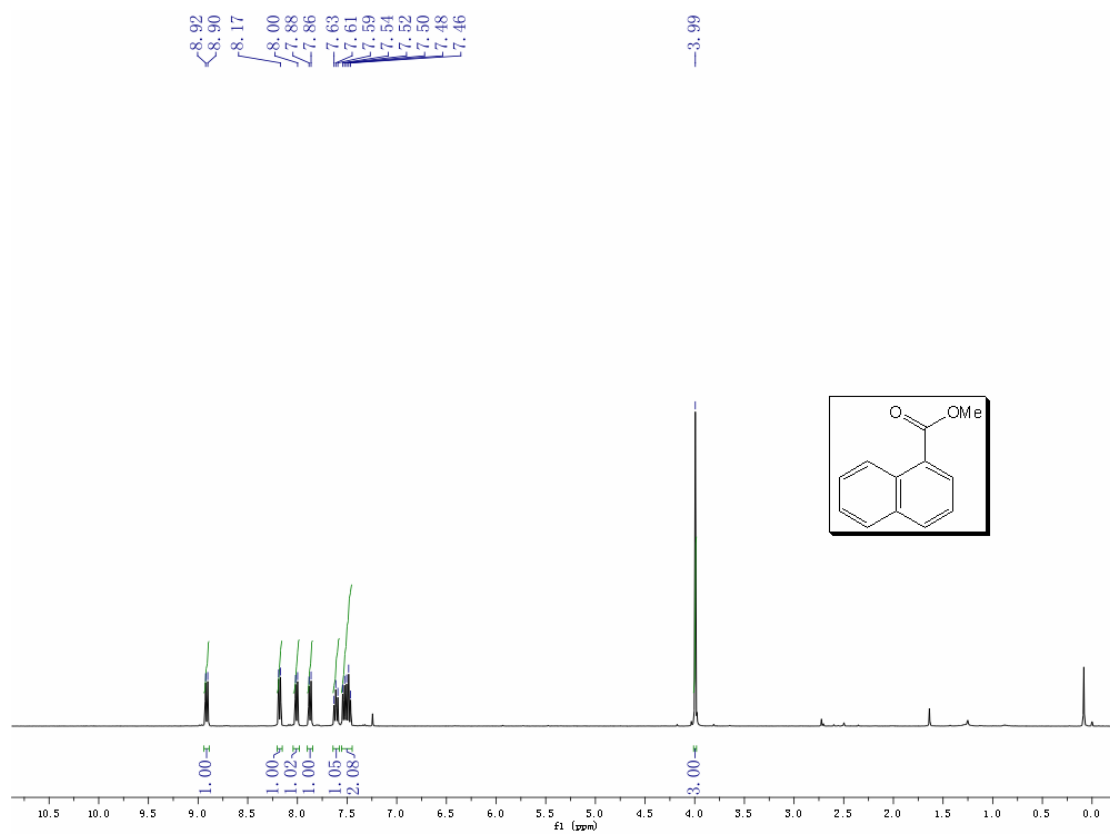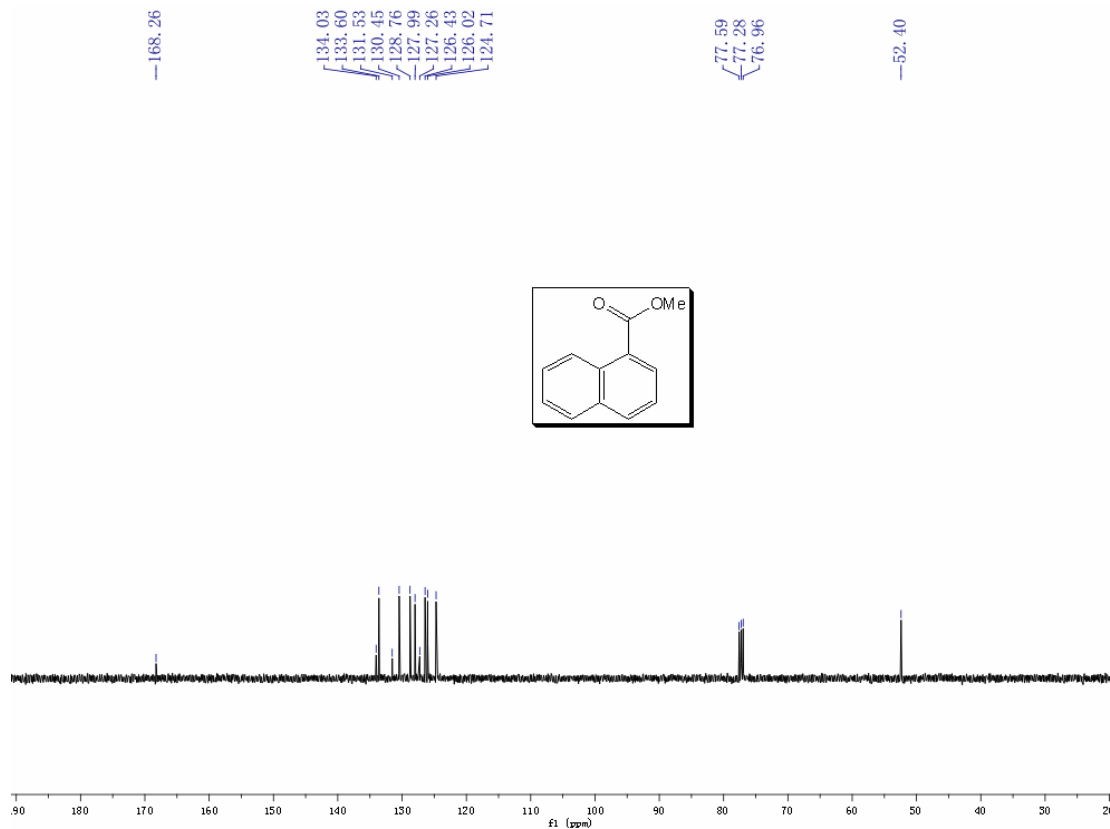

4f:

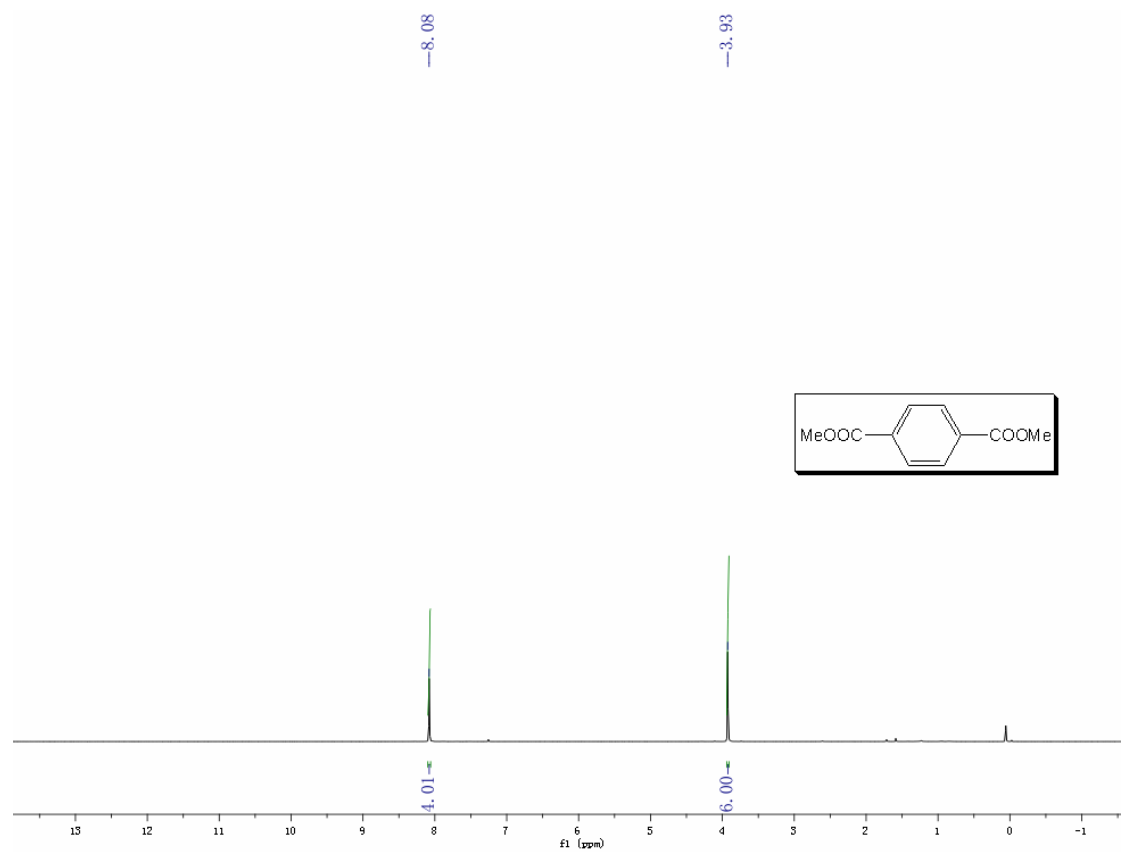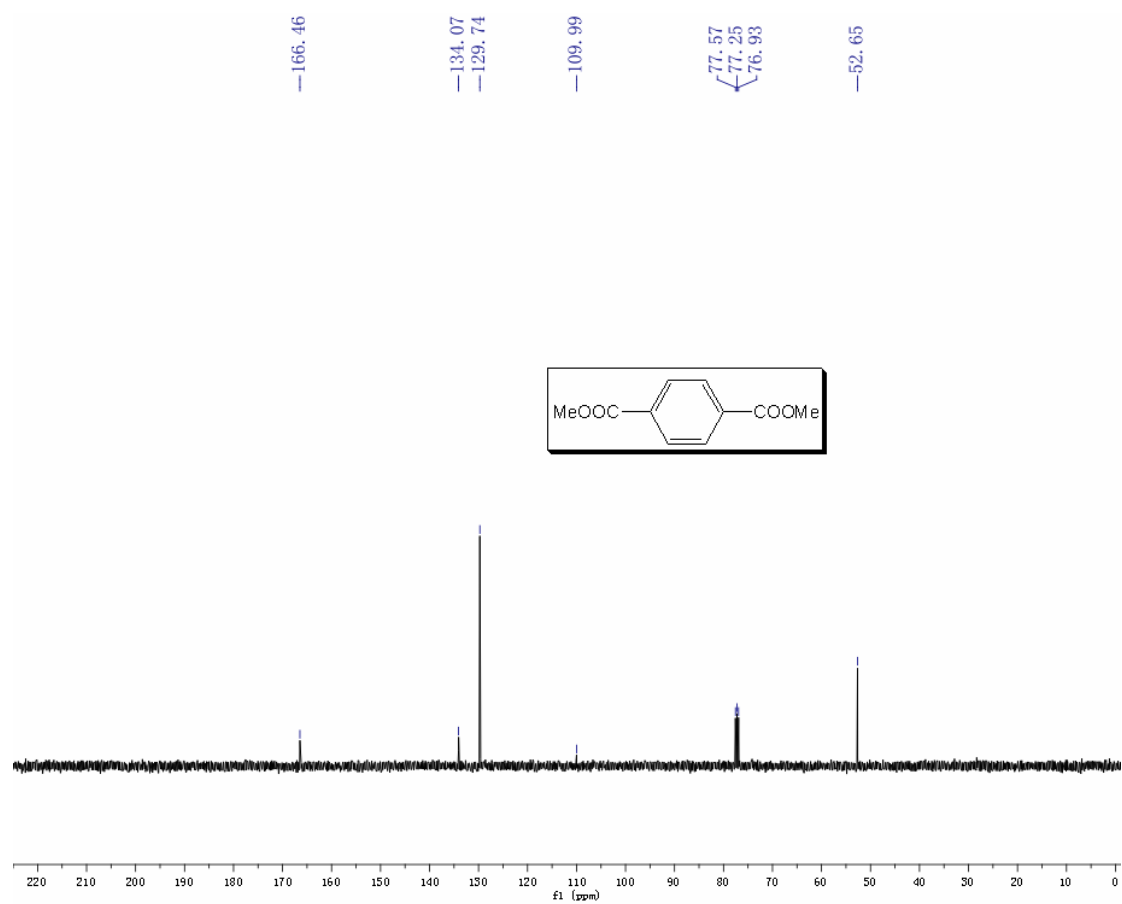

4g:

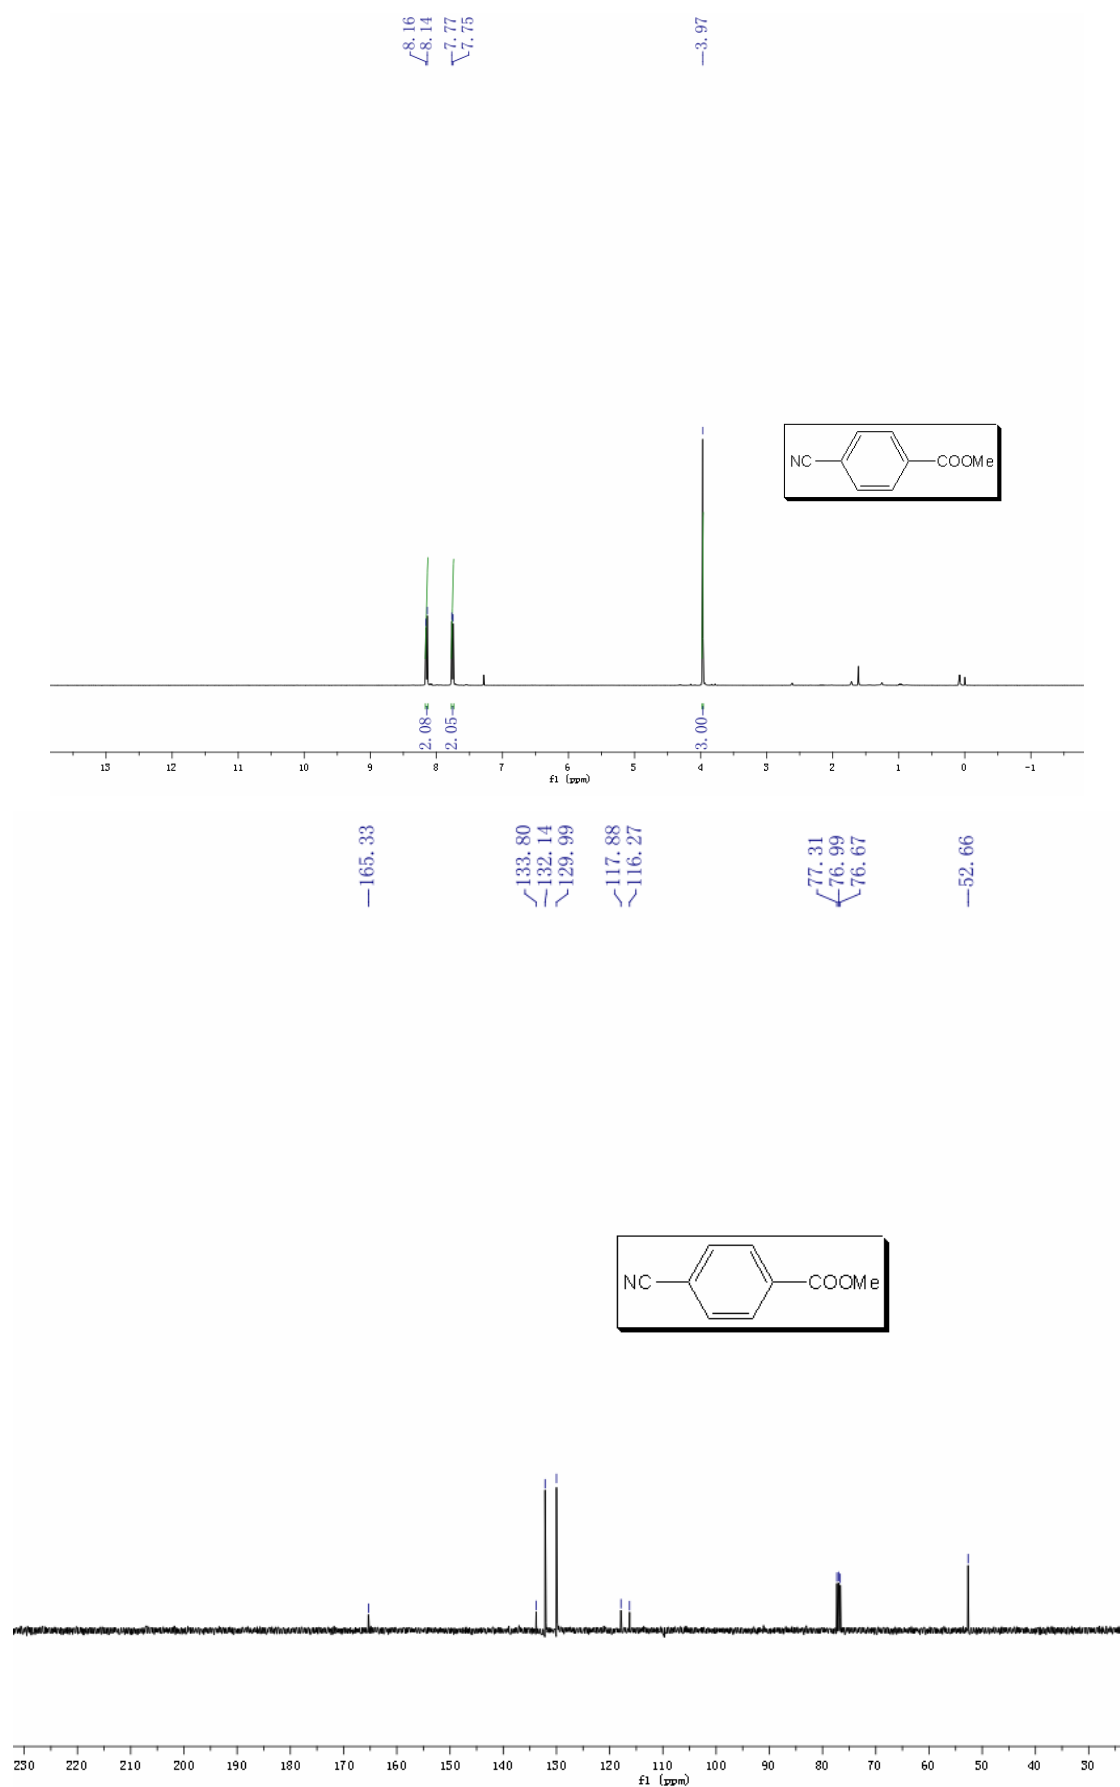



4h:

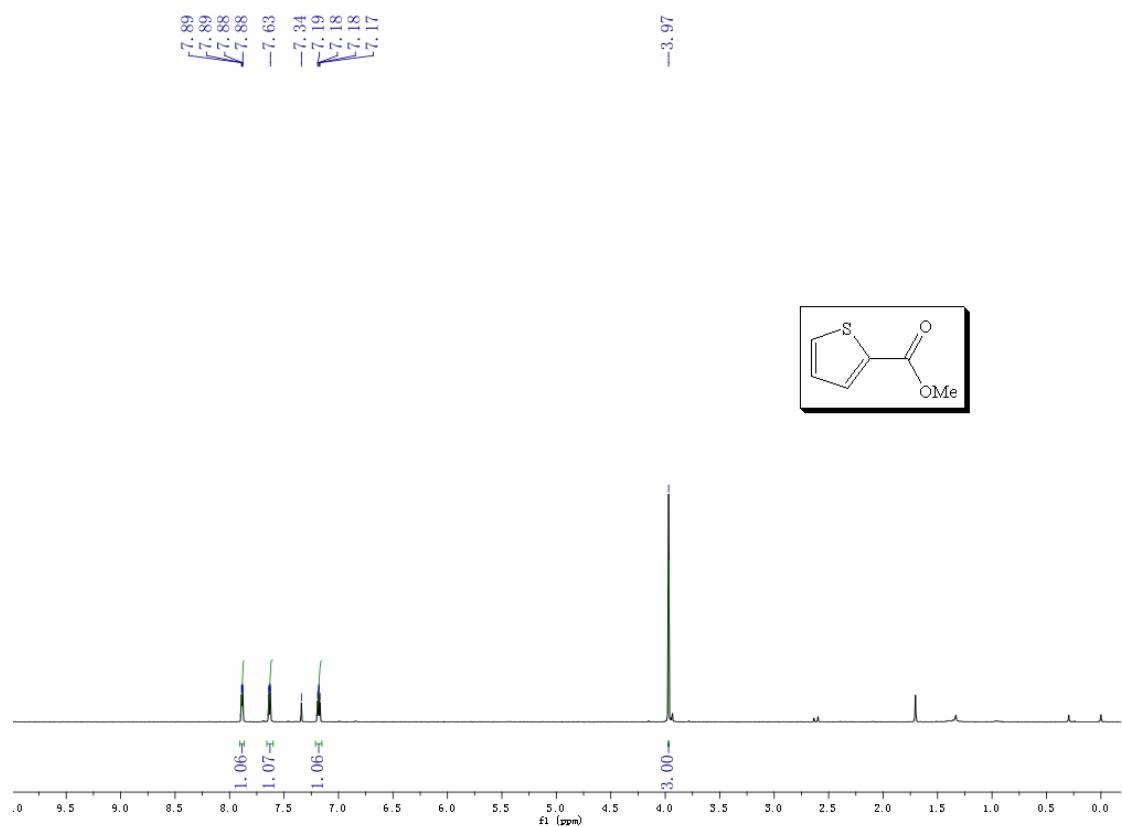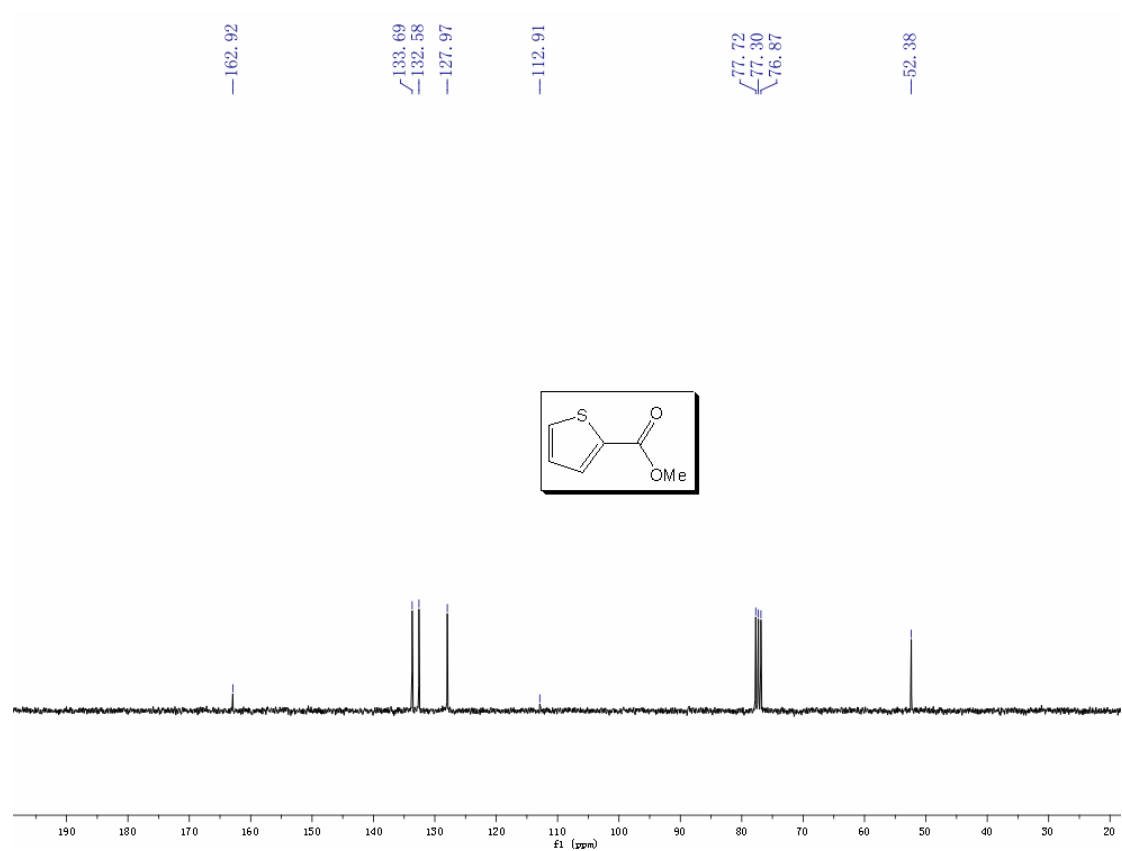

4i:

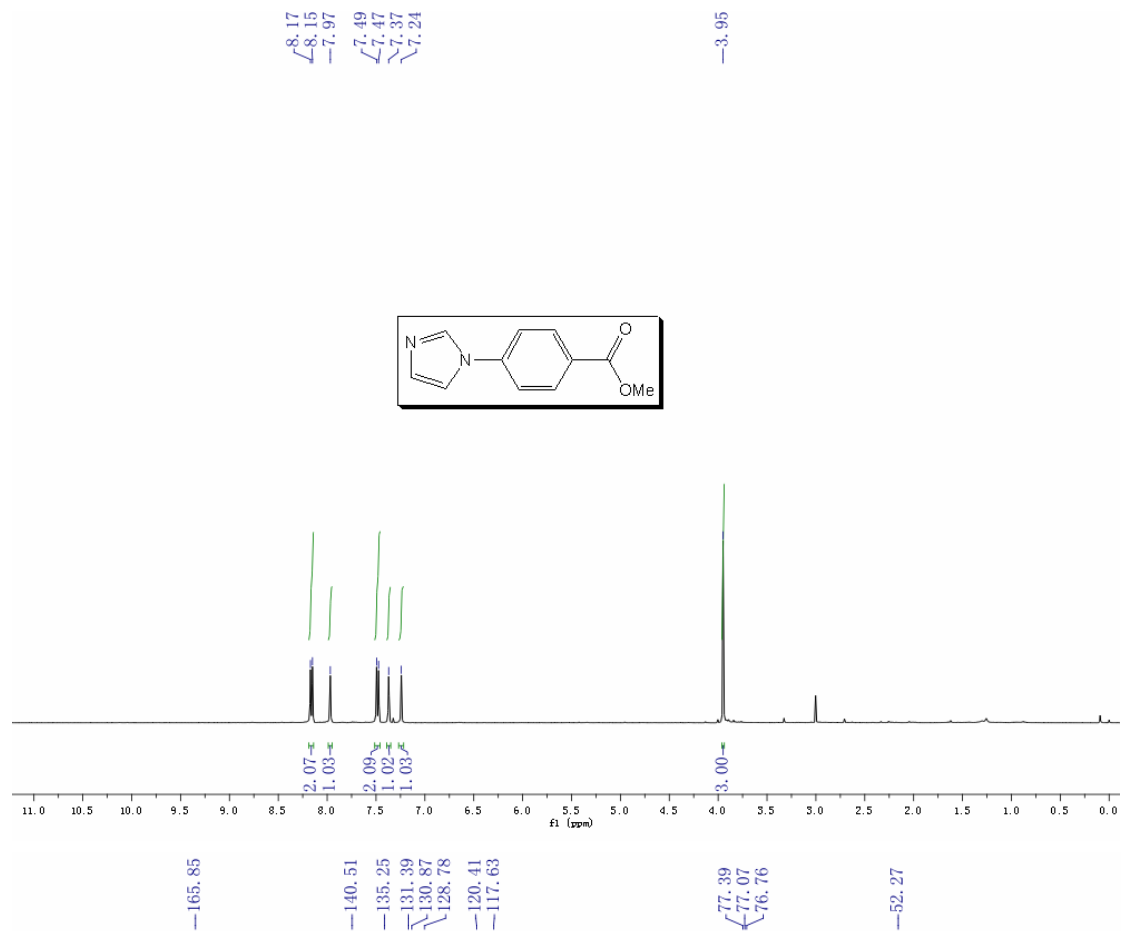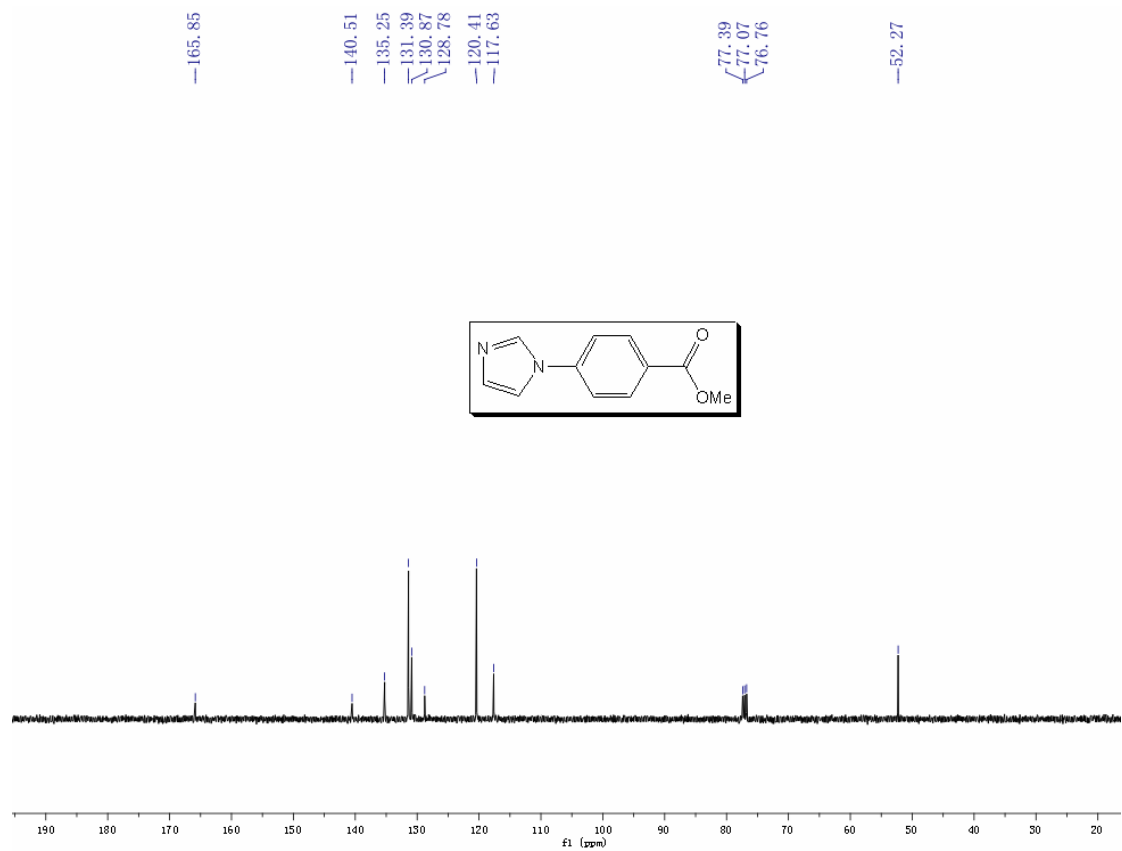

4j:

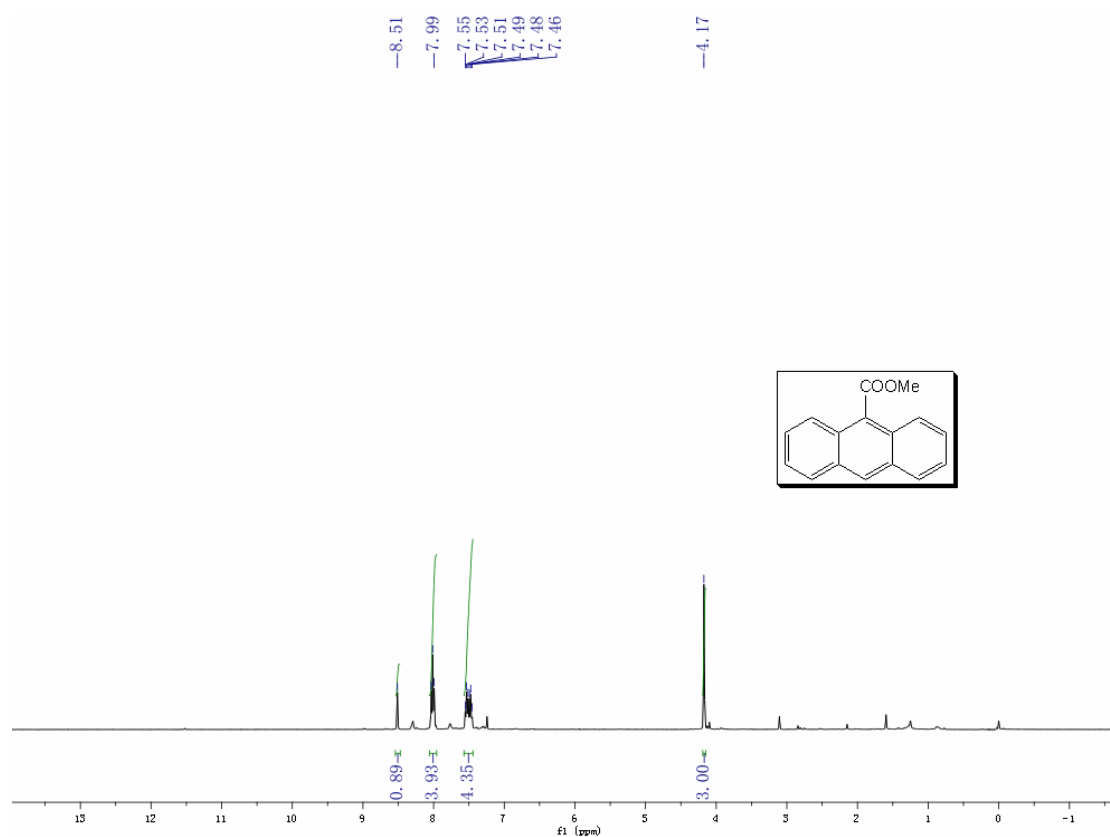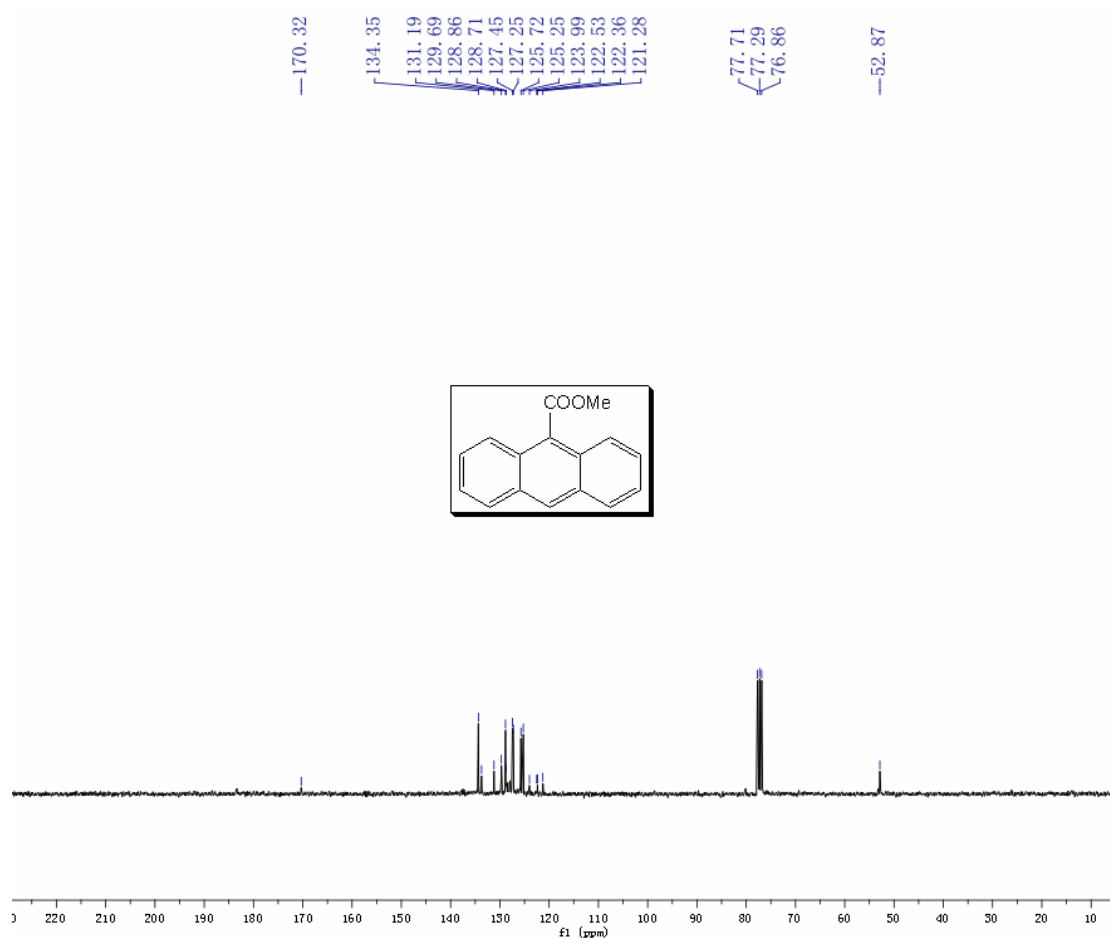

6a:

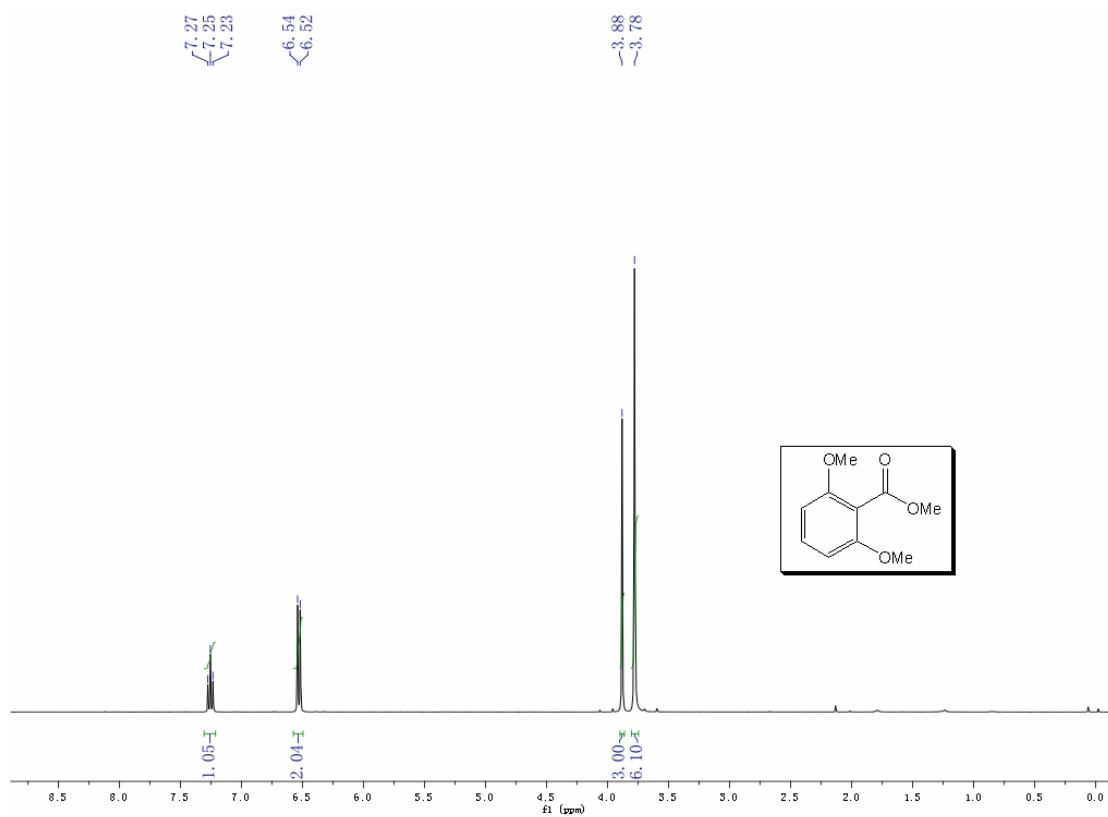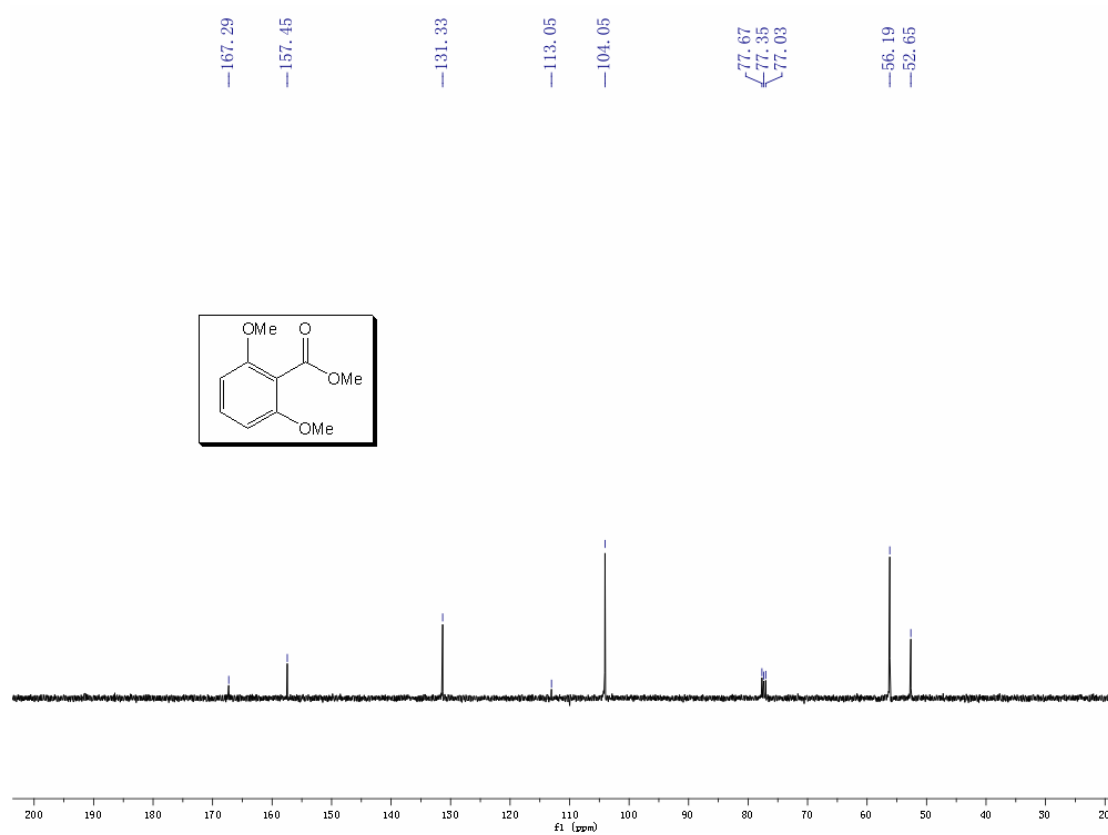

6b:

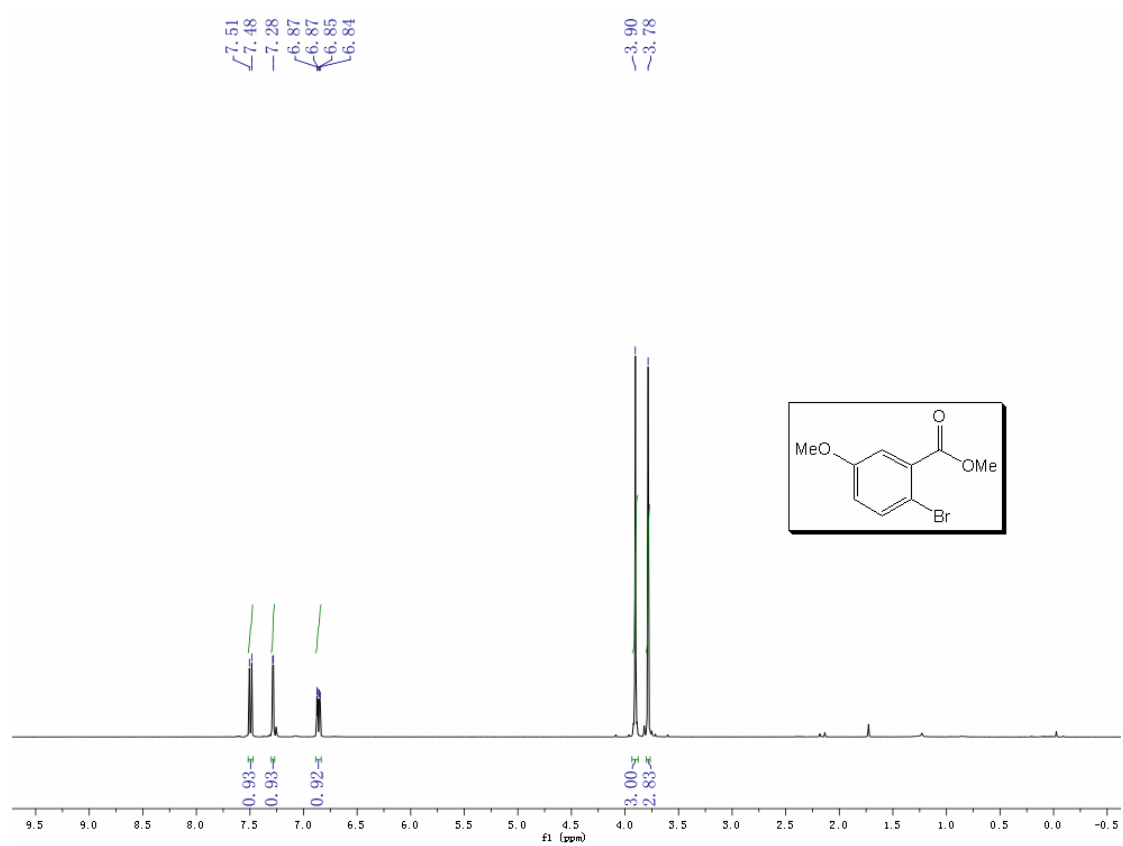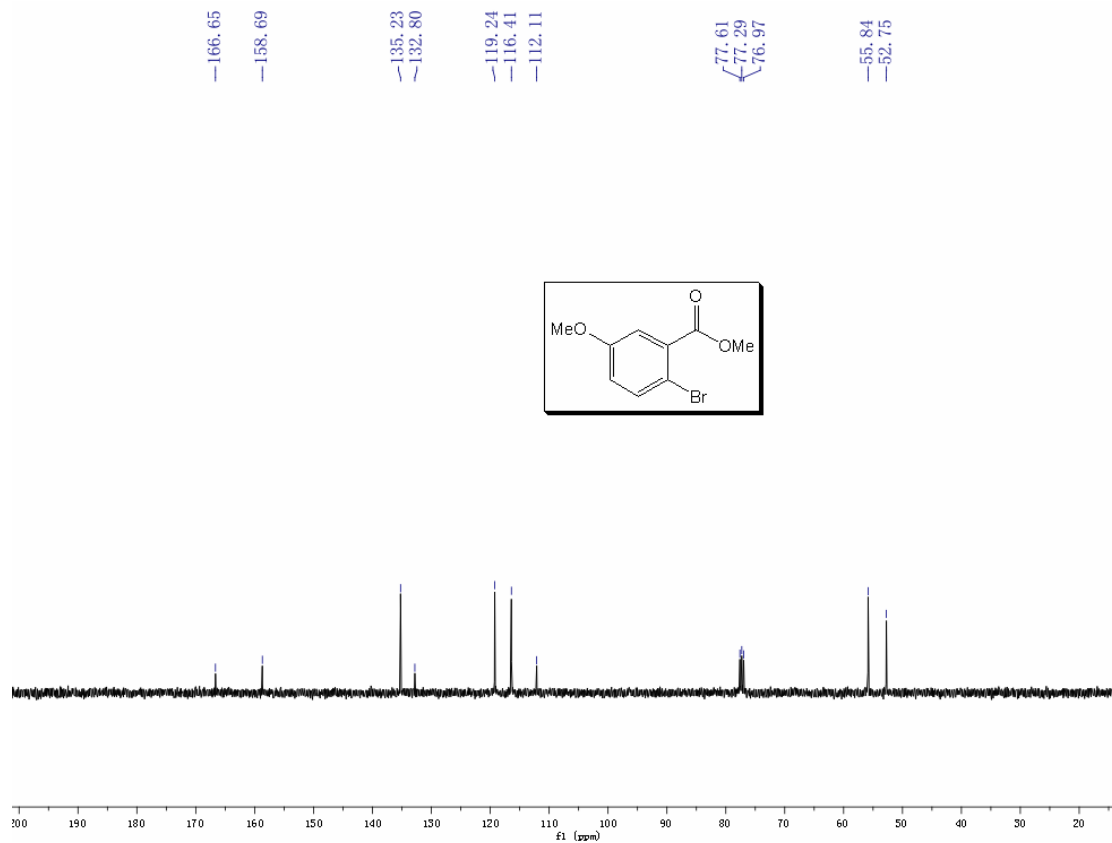

6c:

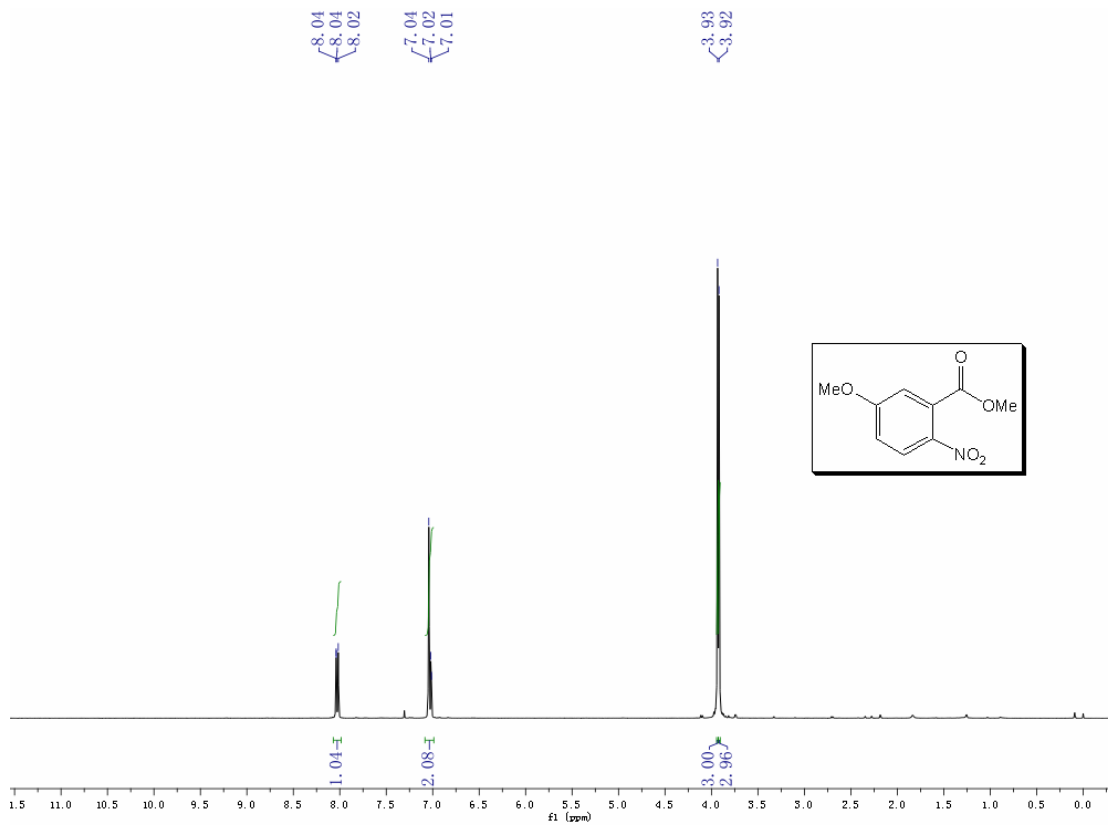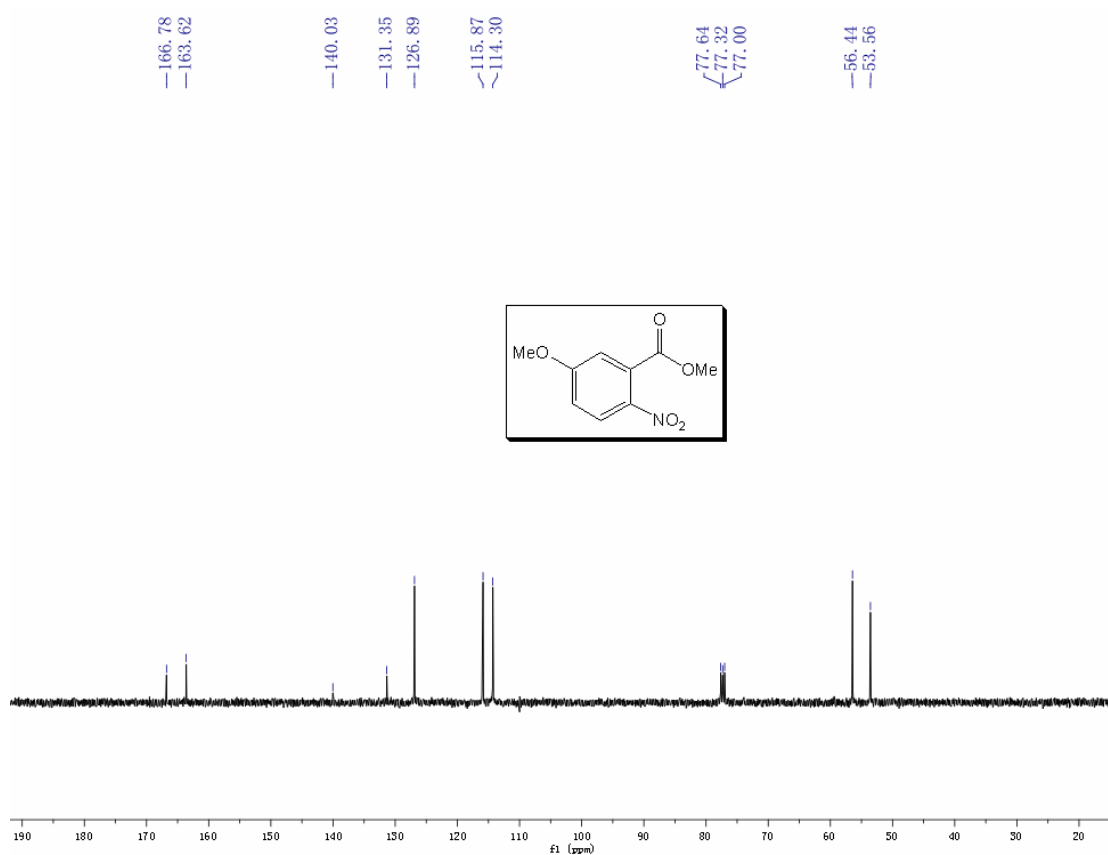

6d:

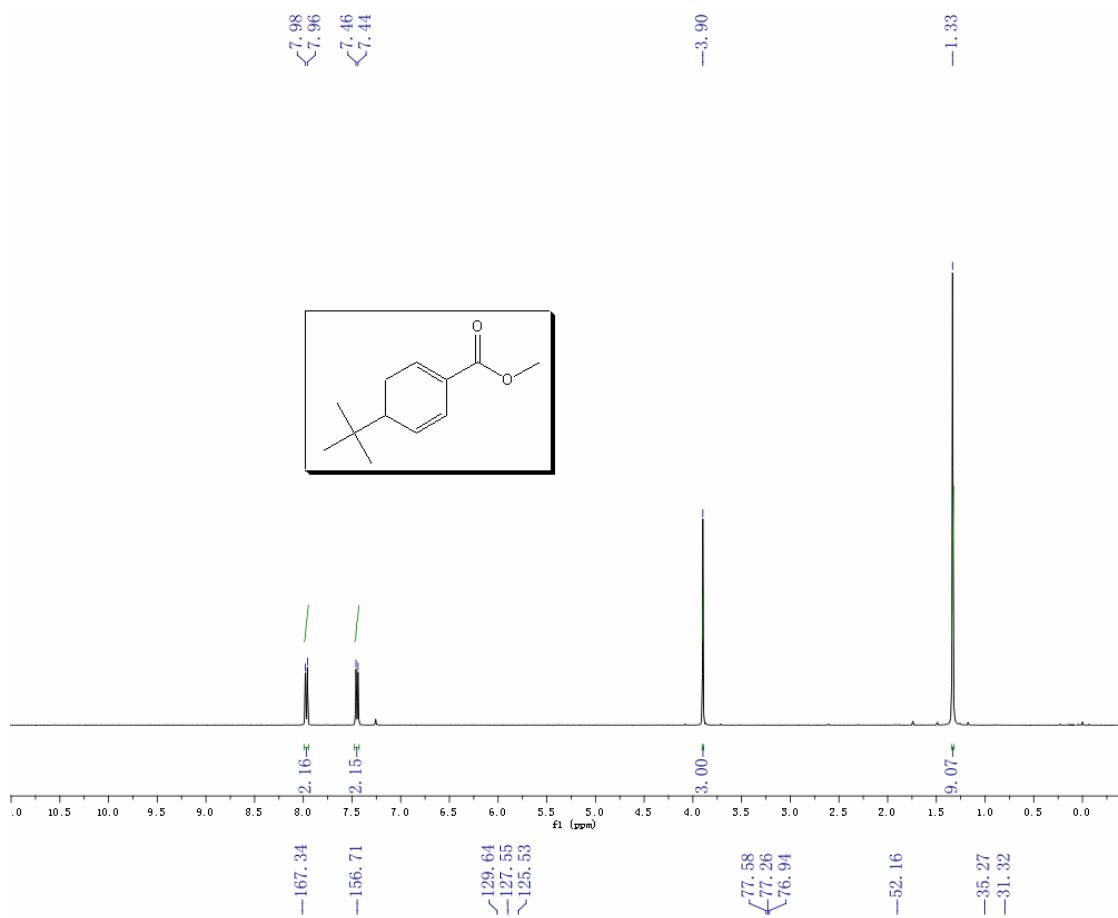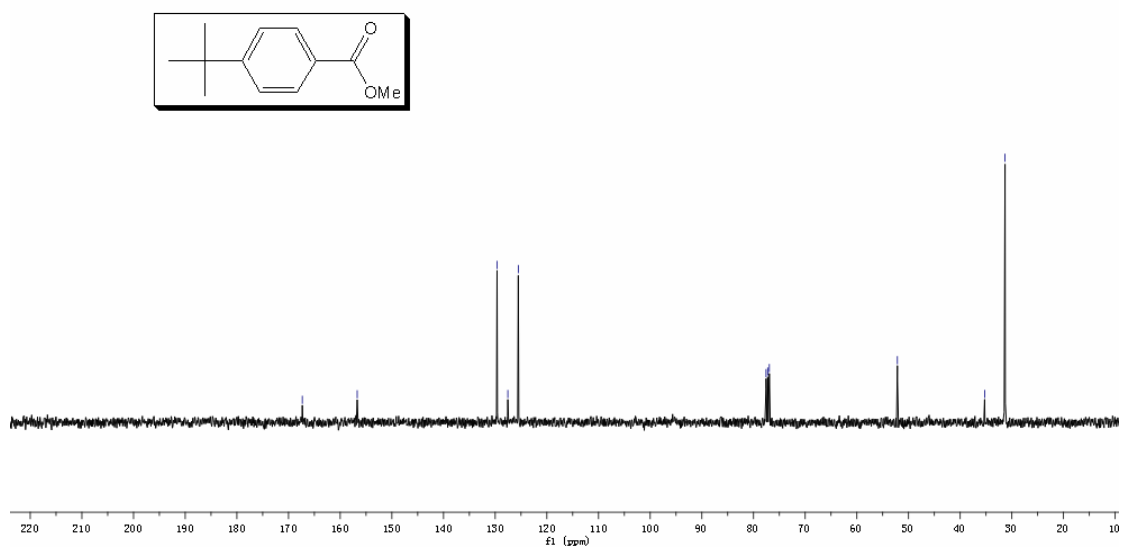

6e:

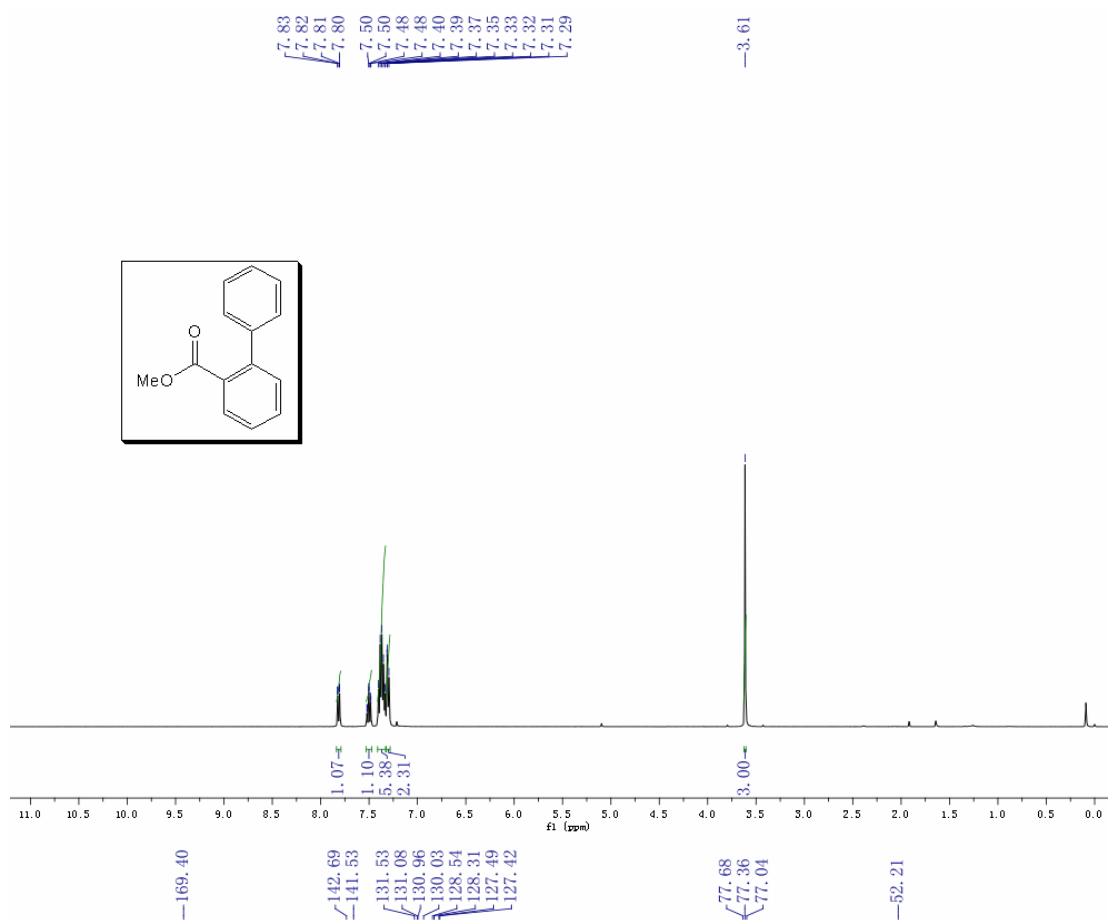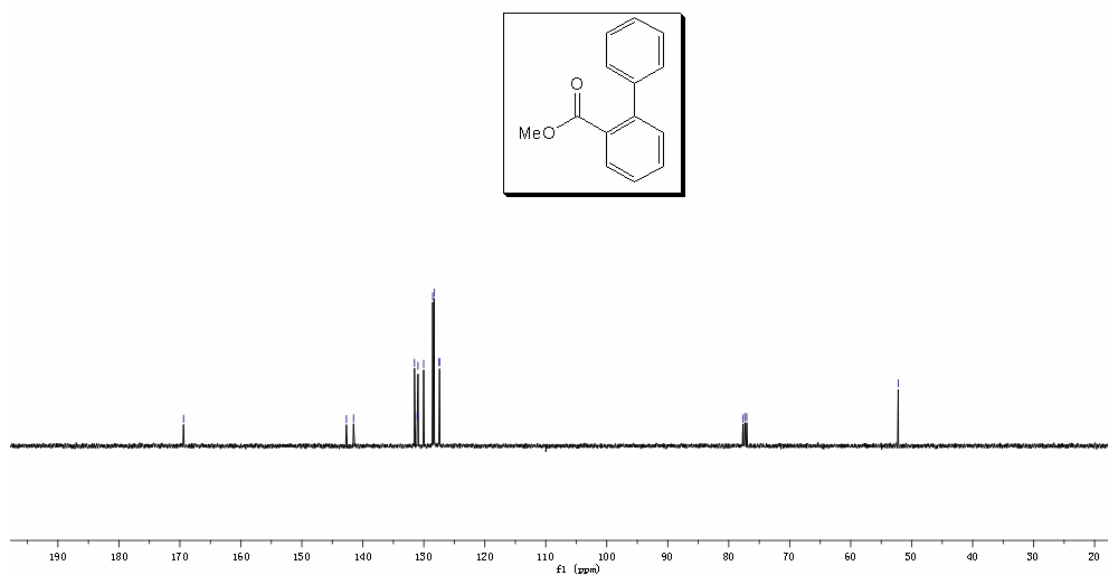



6f:

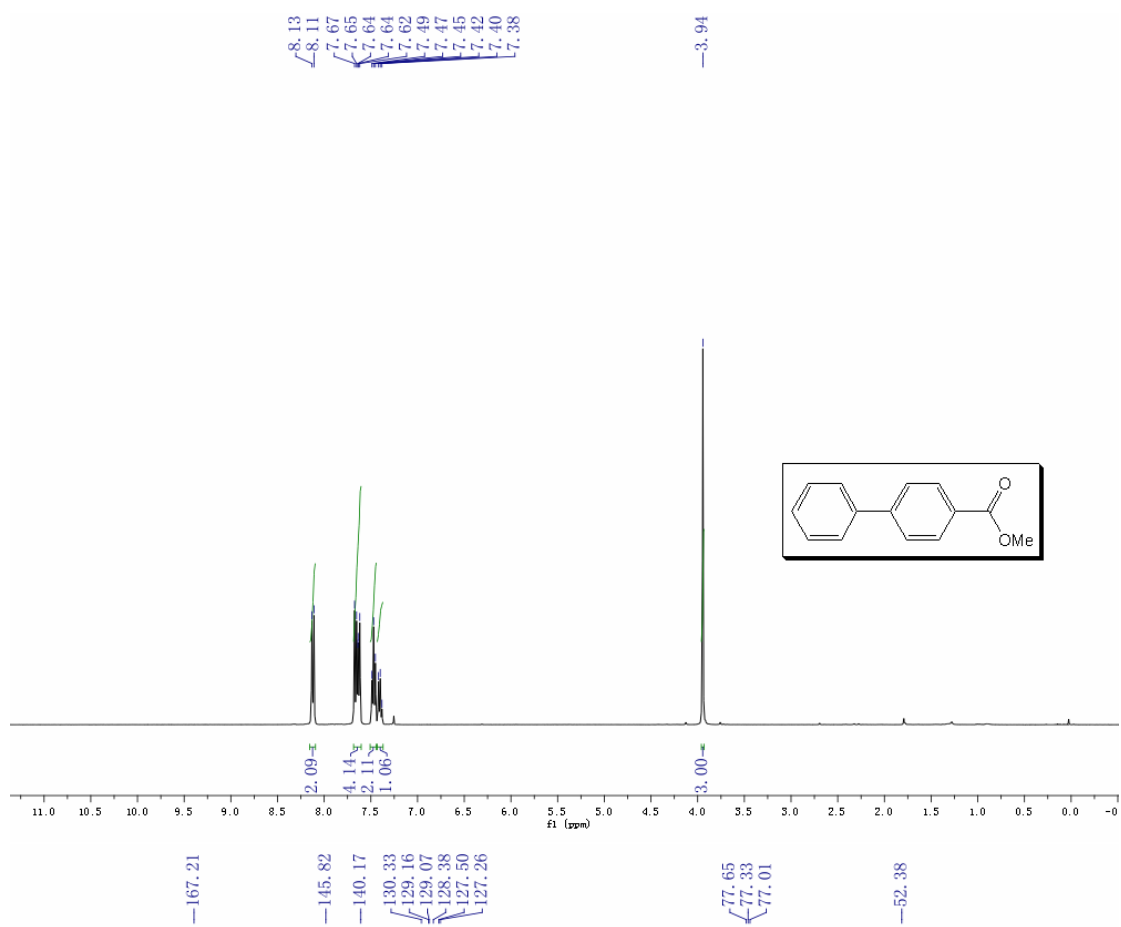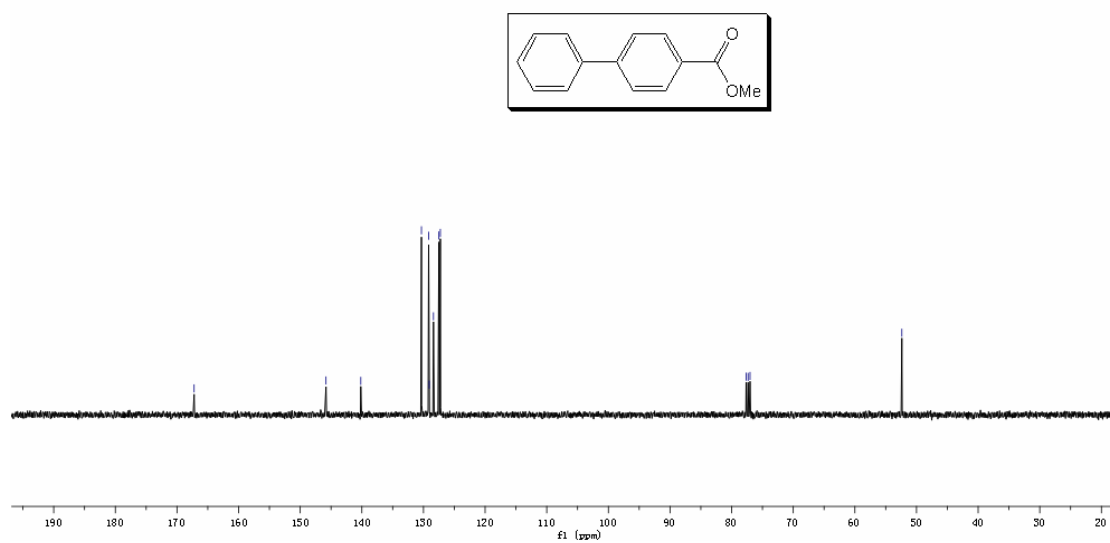

6g:

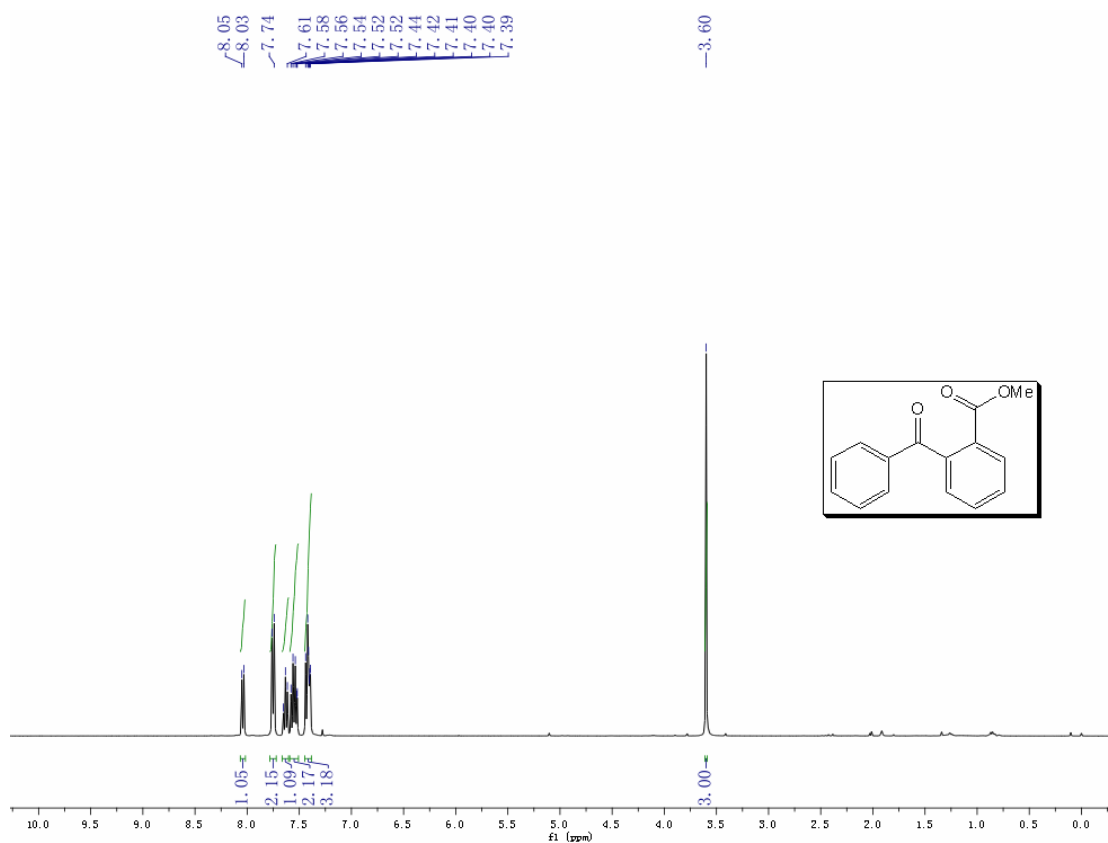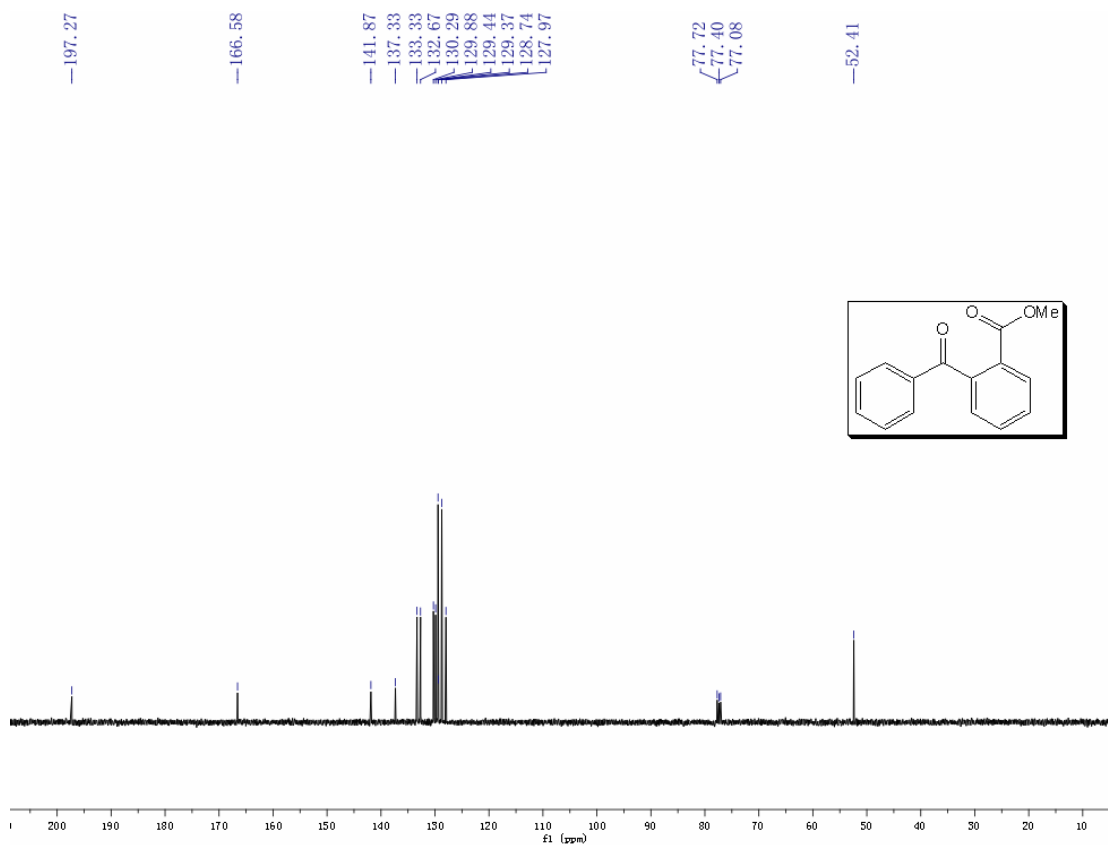

6h:

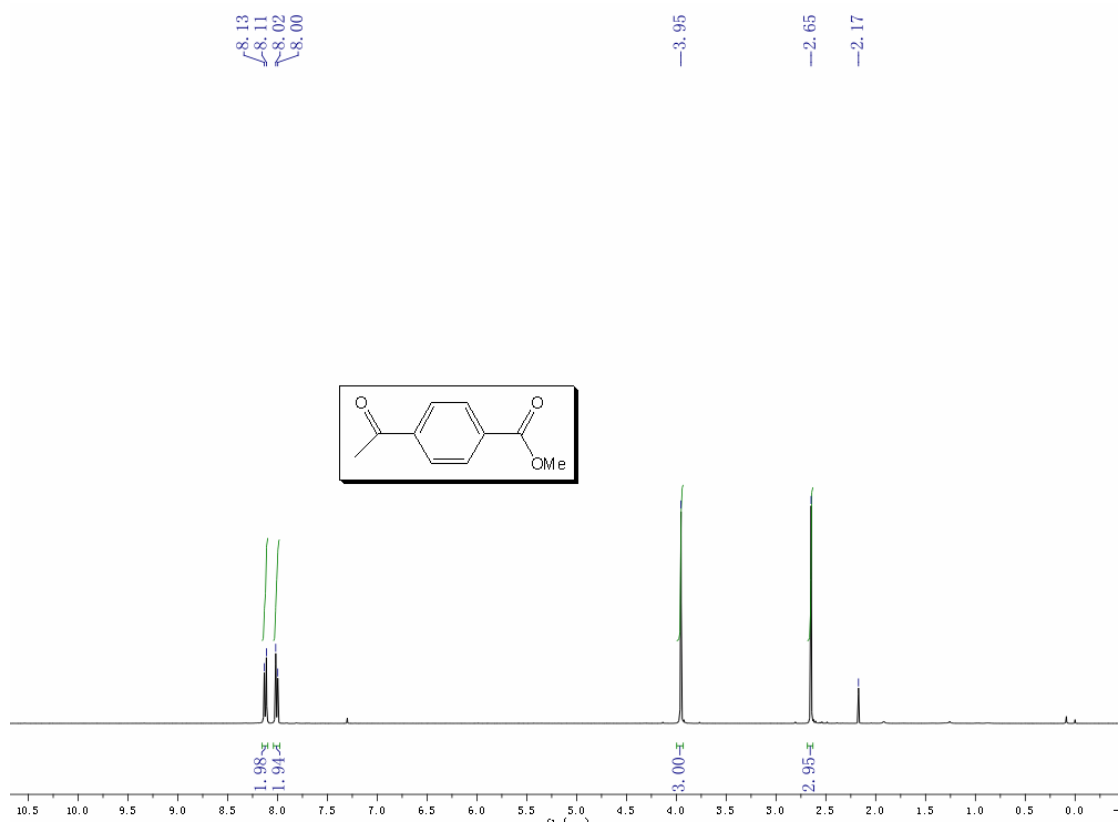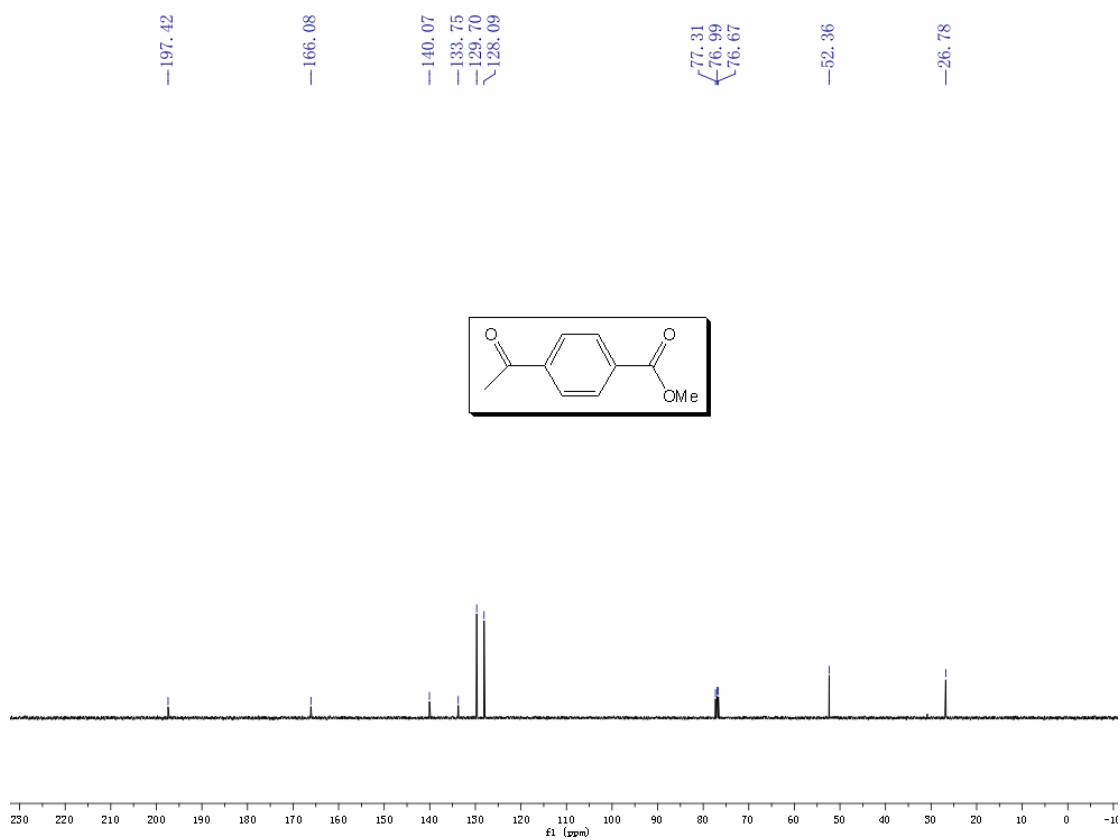

6i:

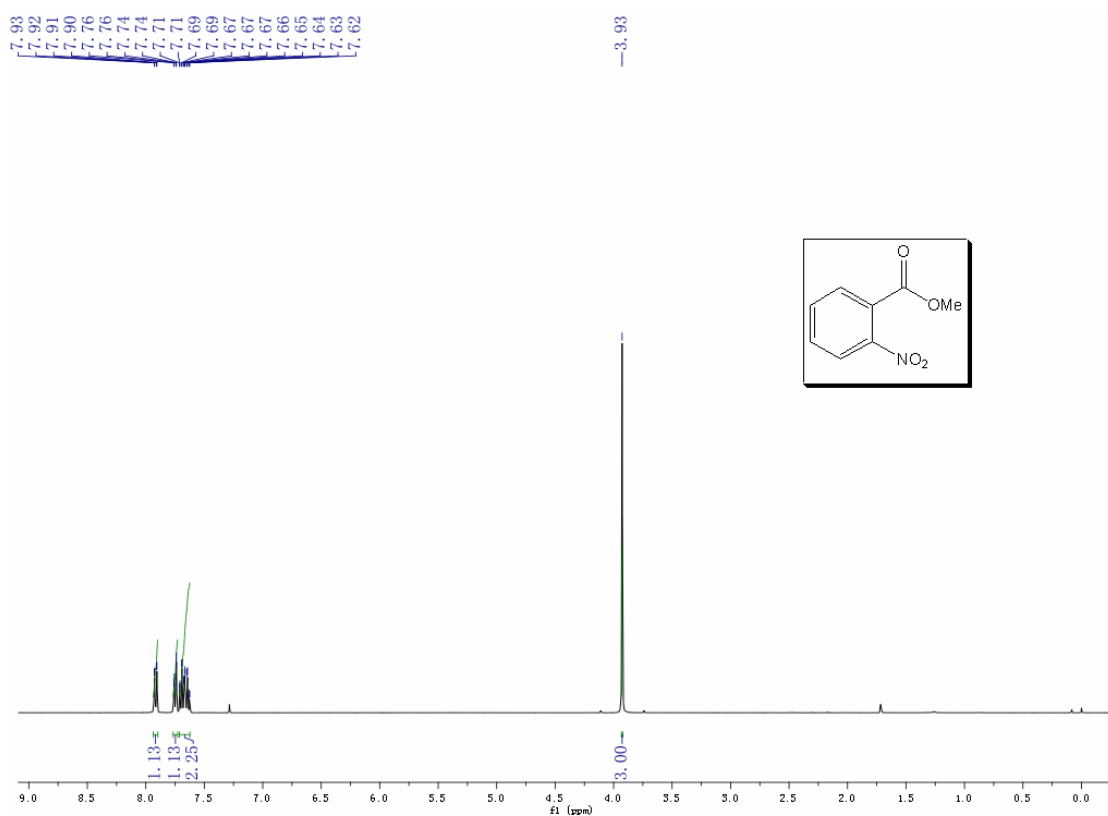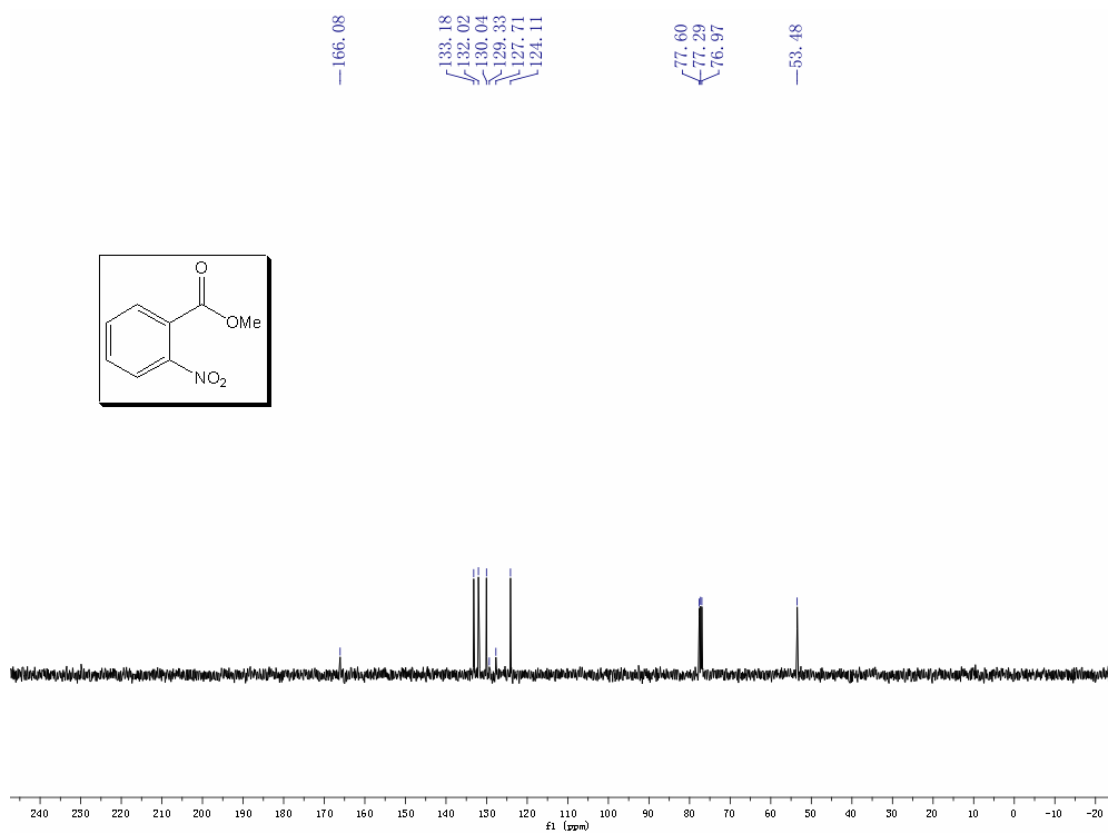

6j:

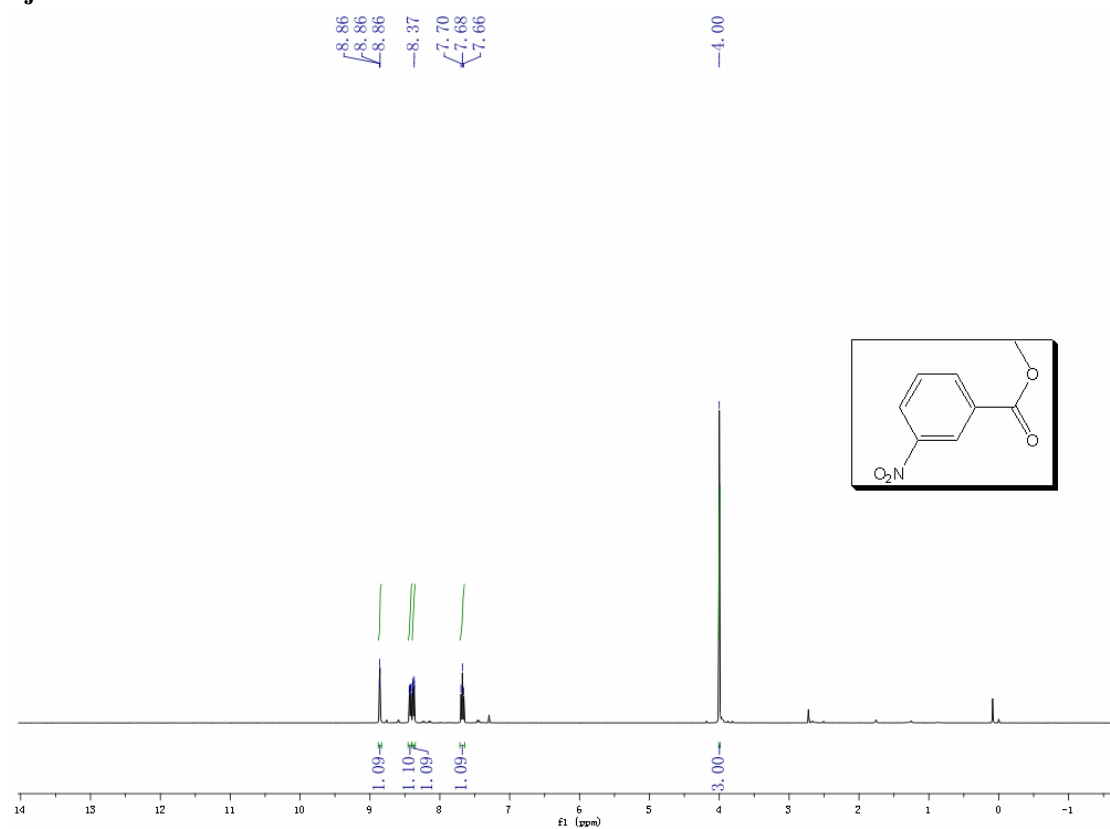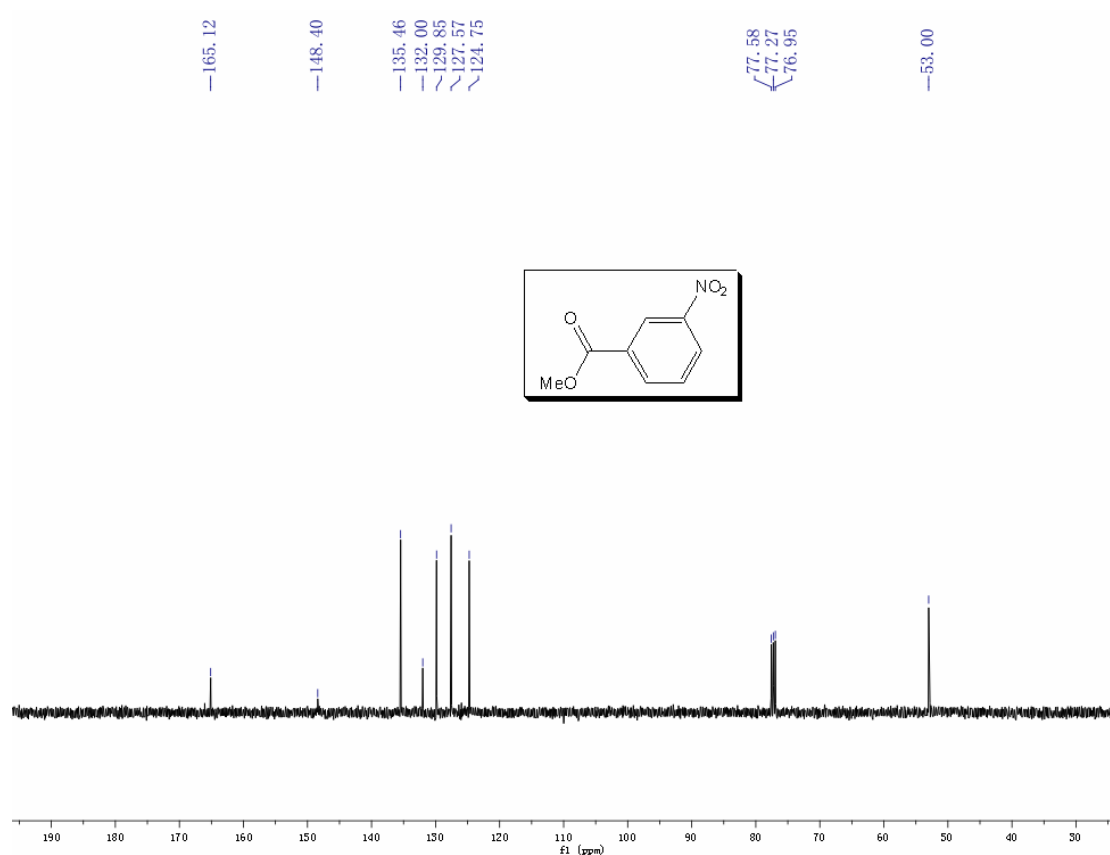

6k:

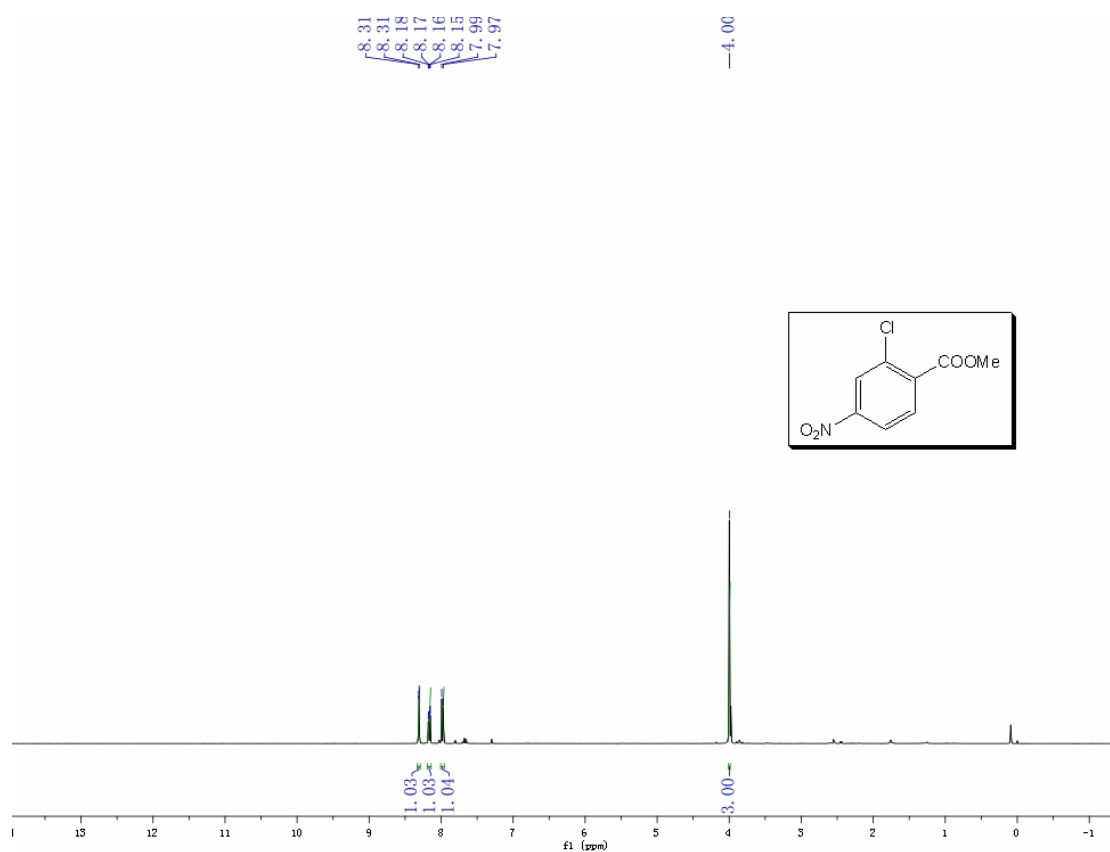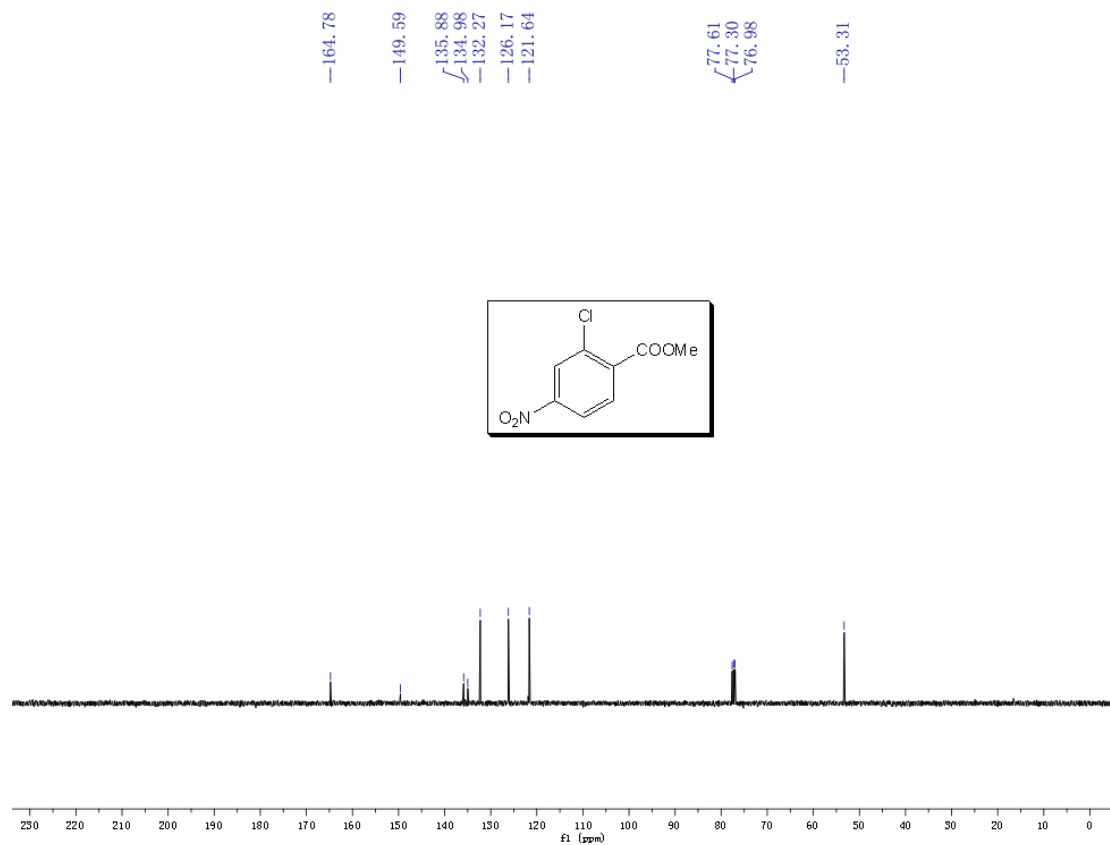

6l:

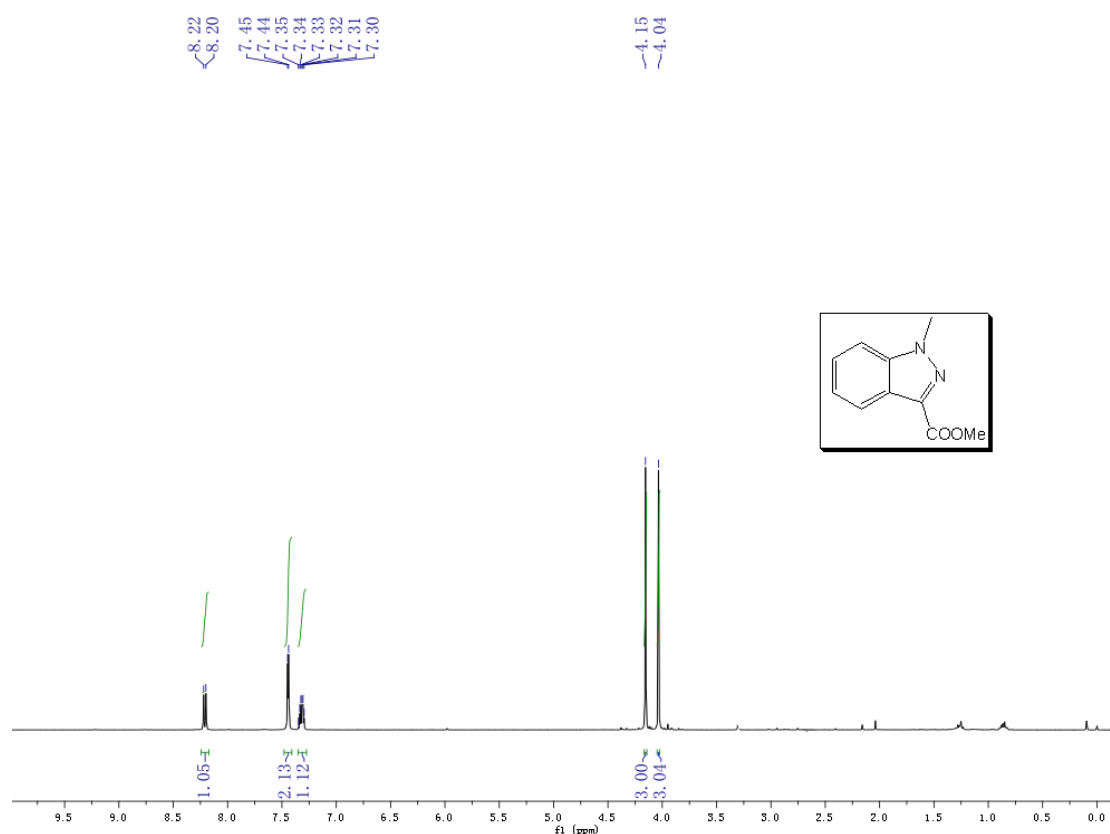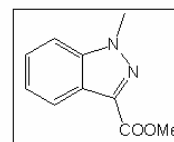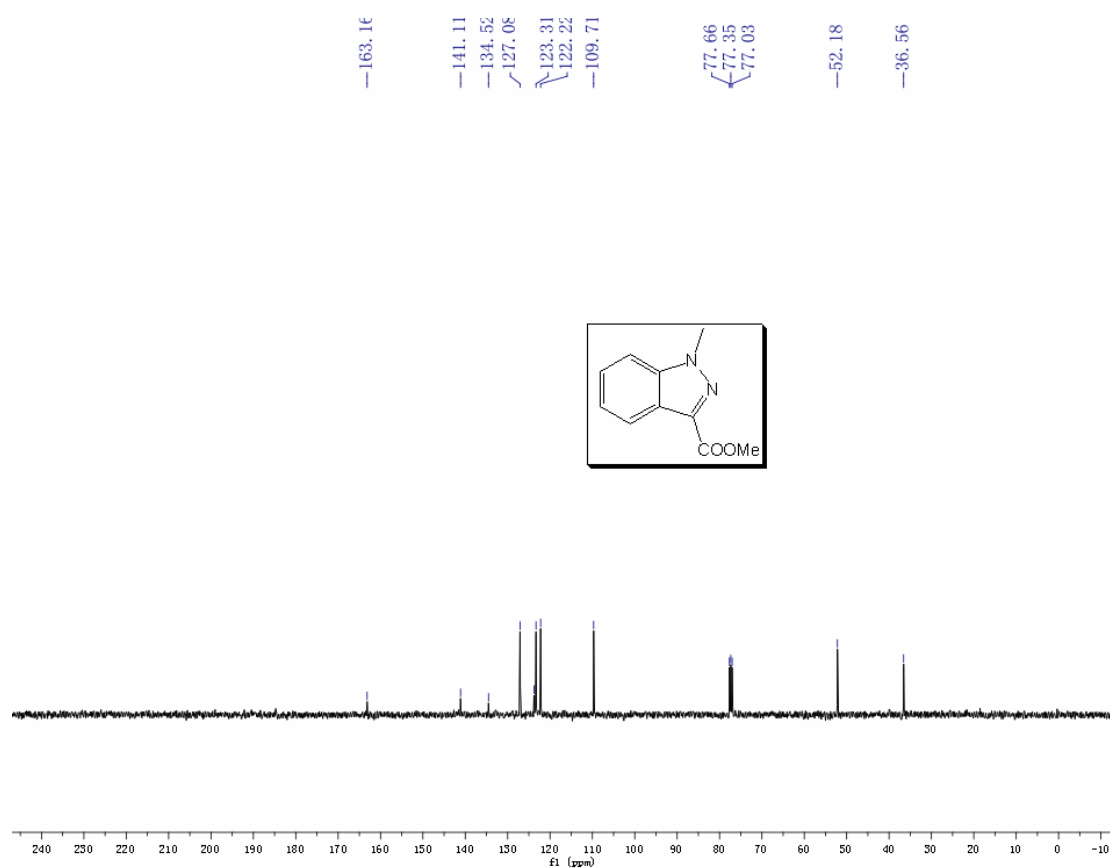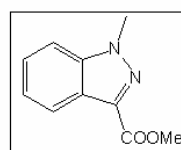

6m:

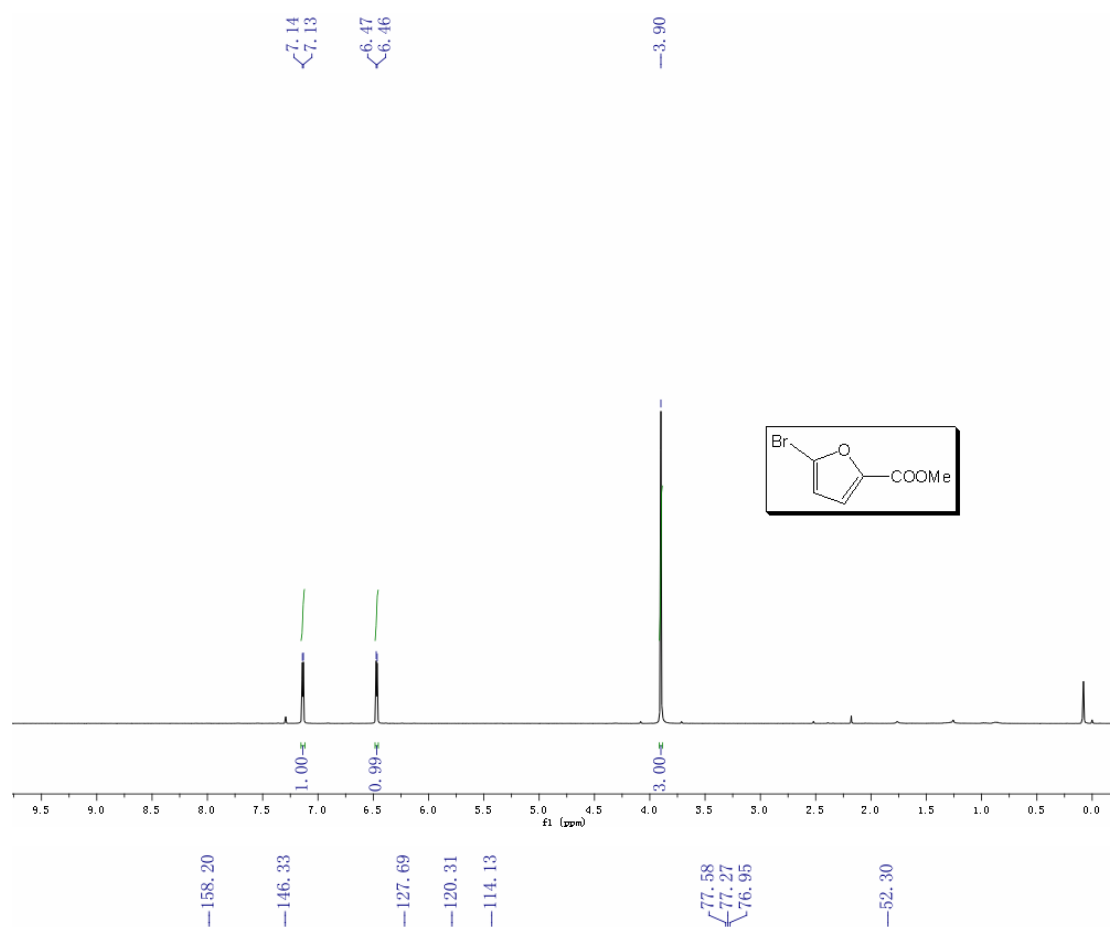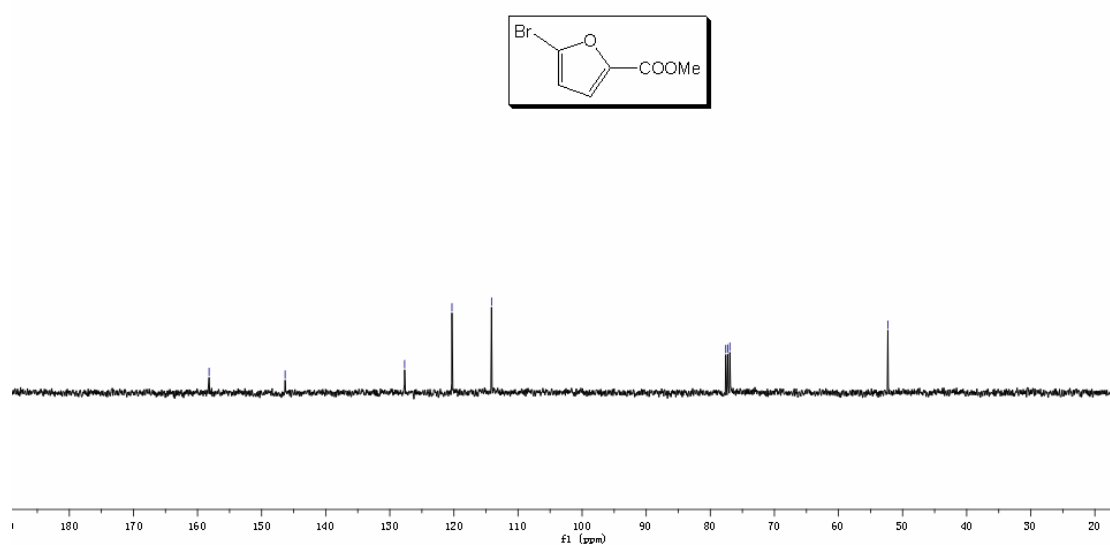



6n:

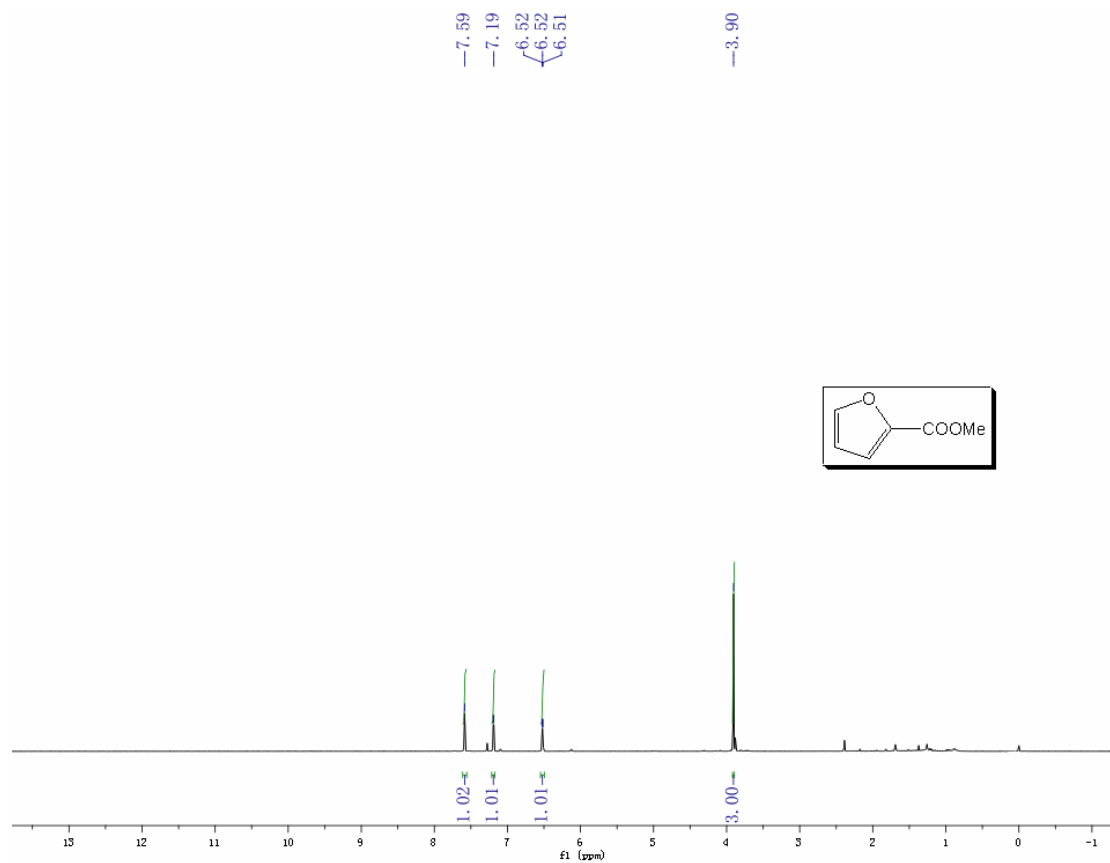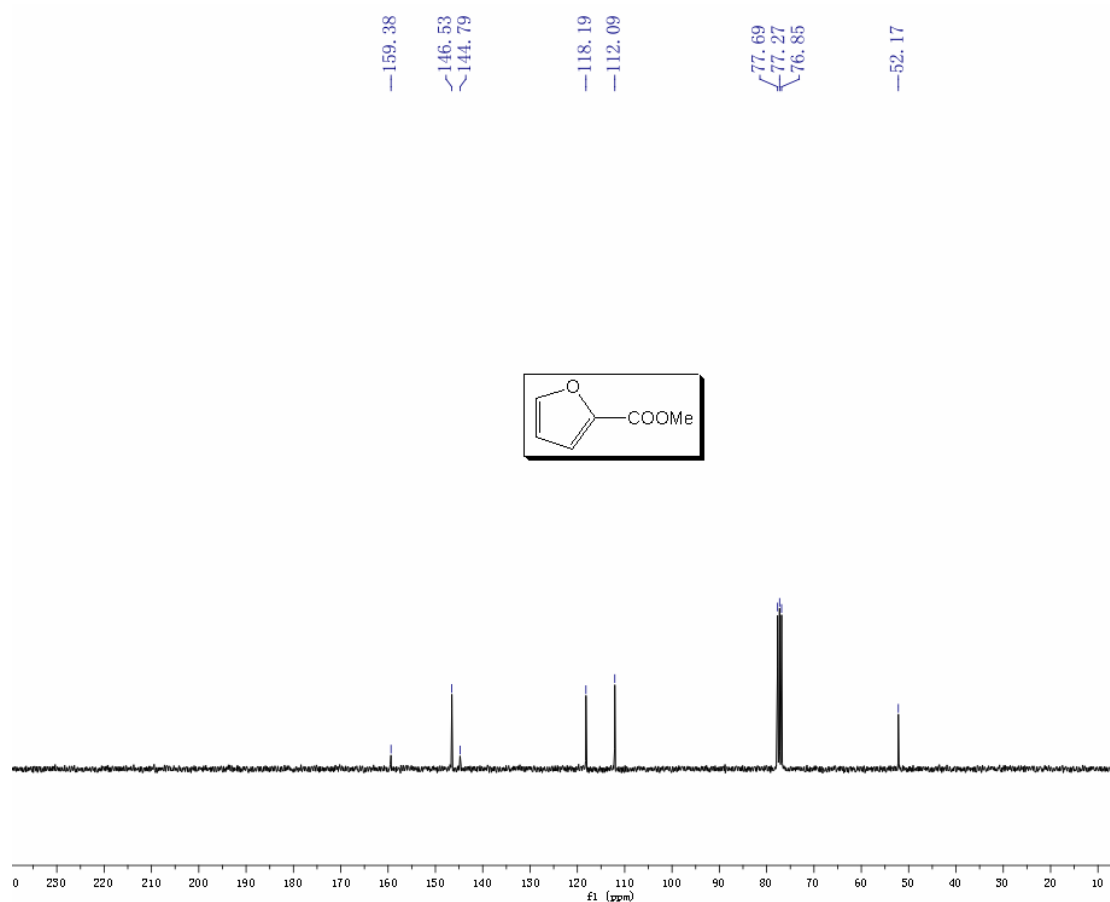

60:

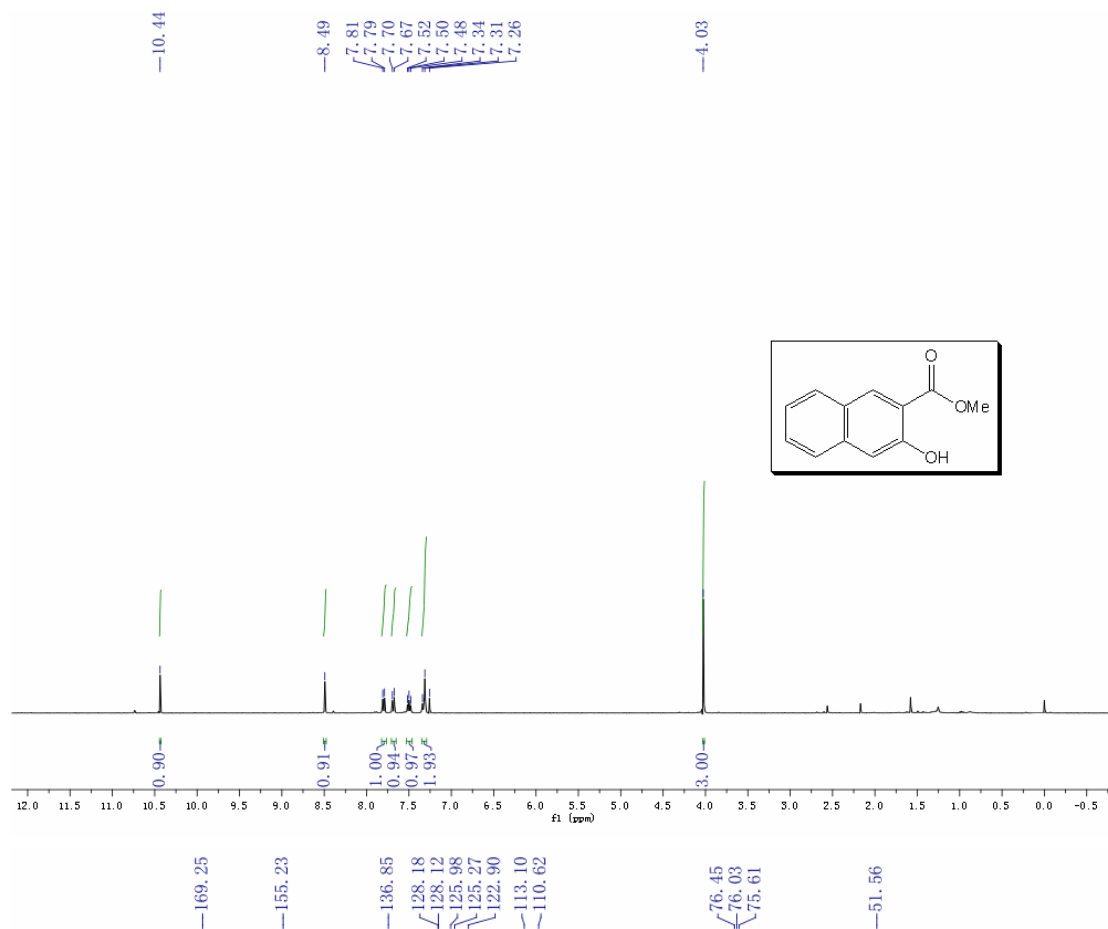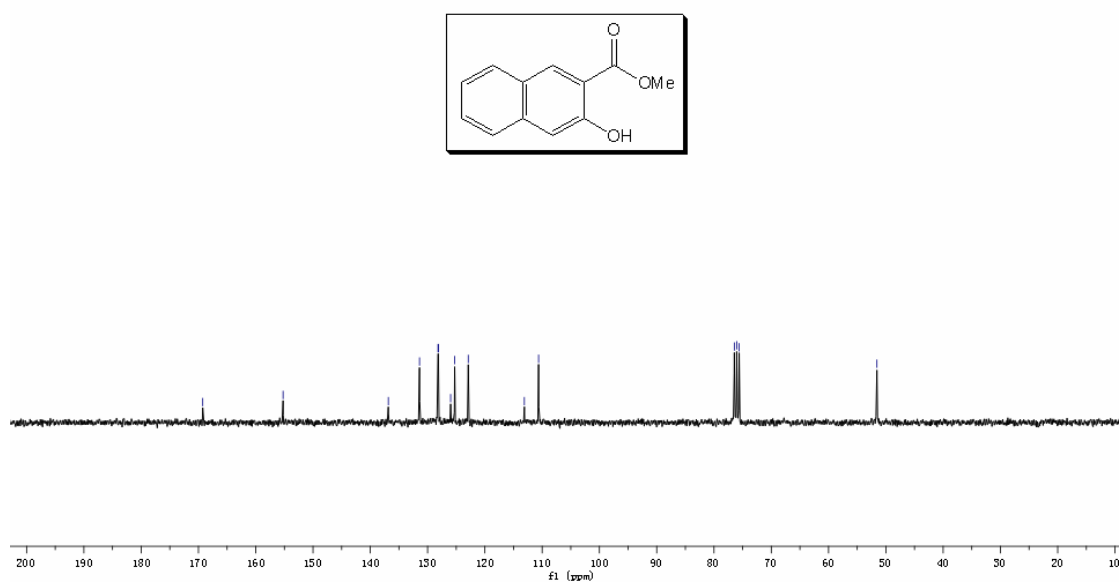

6p:

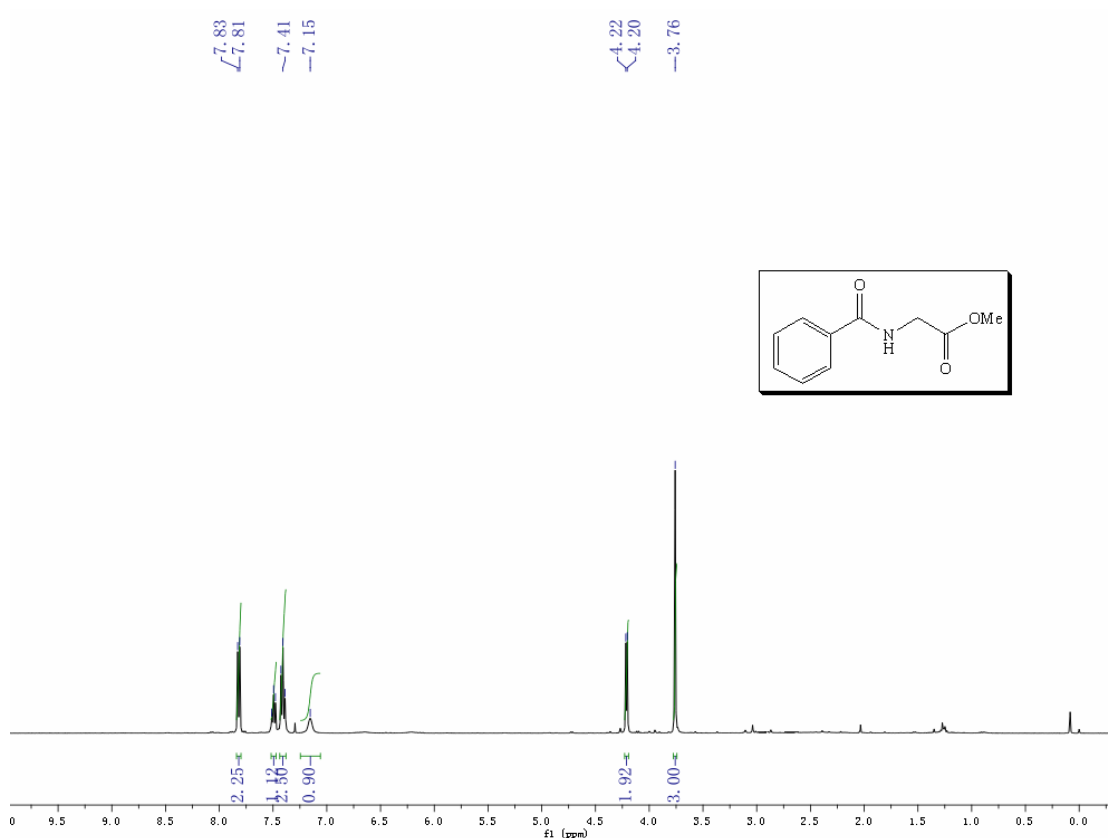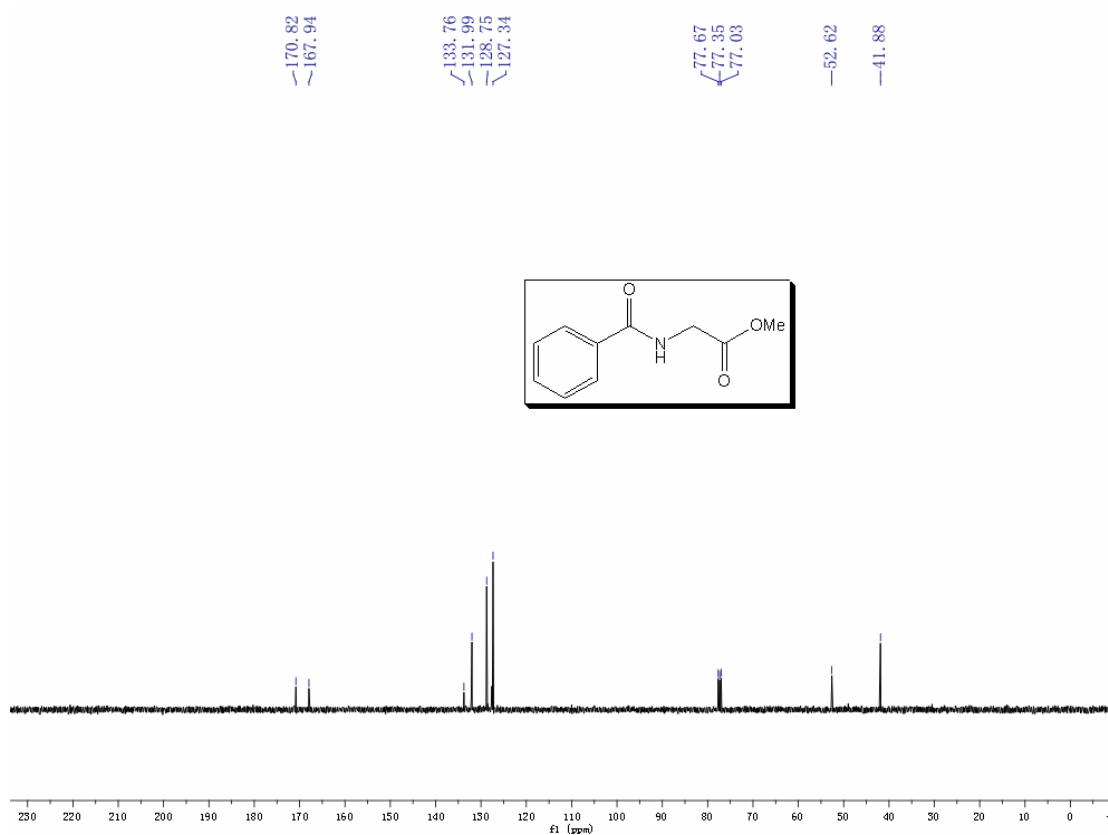

10:

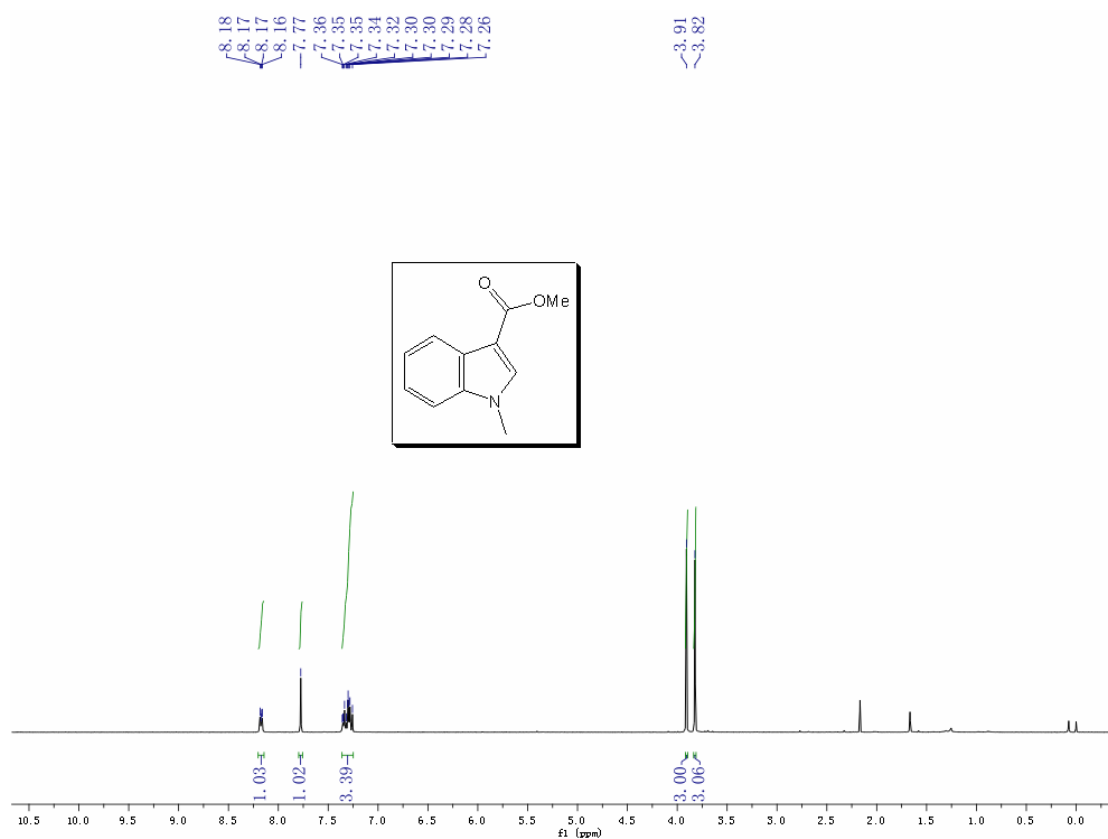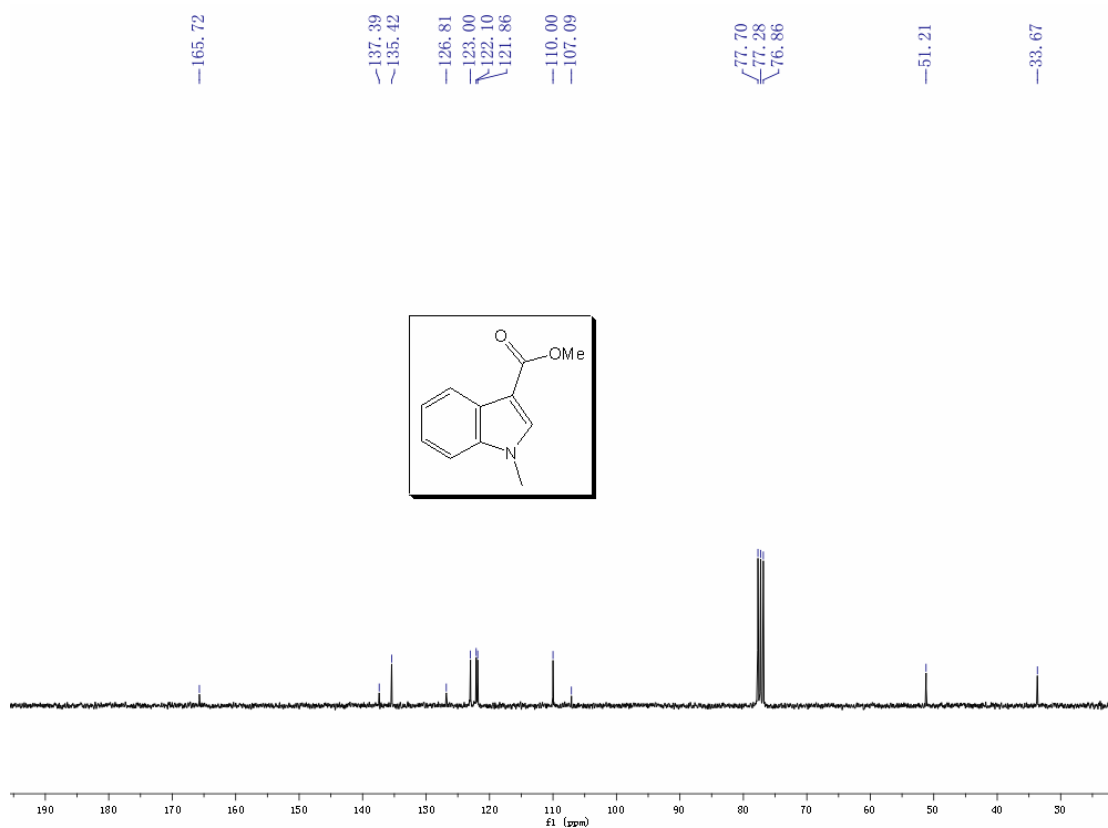

11:

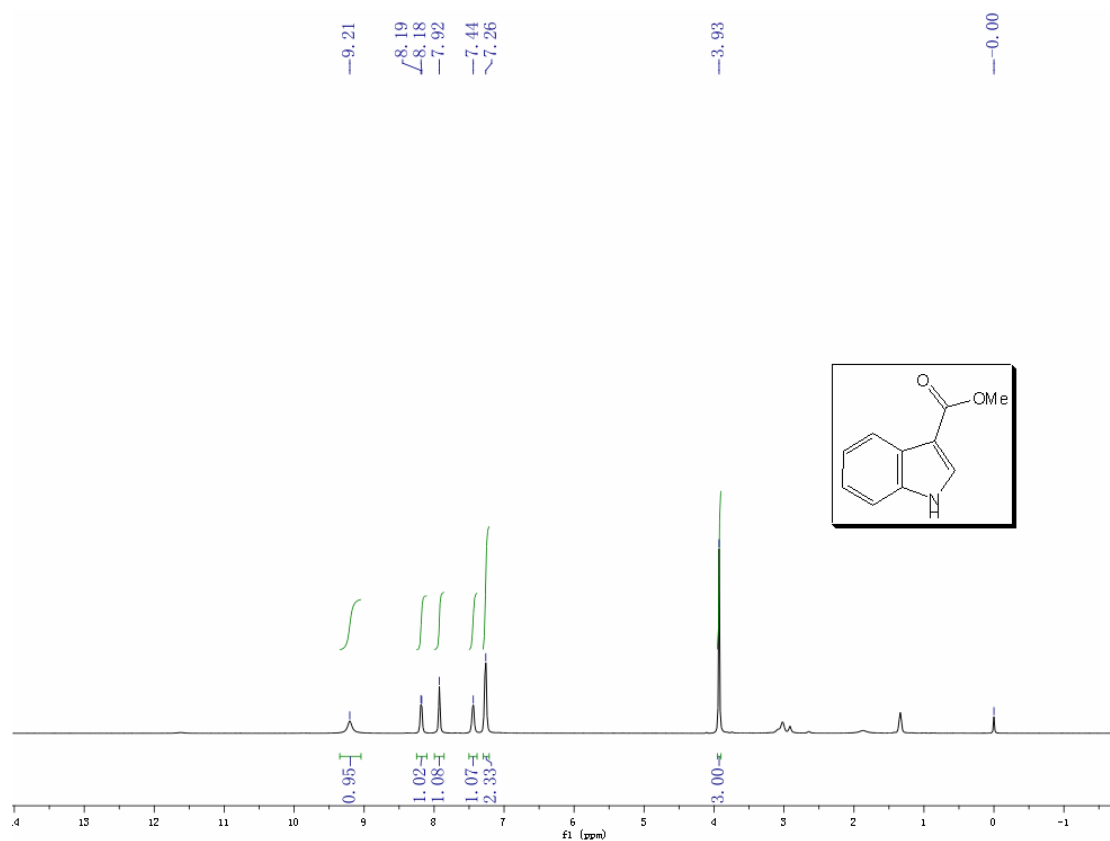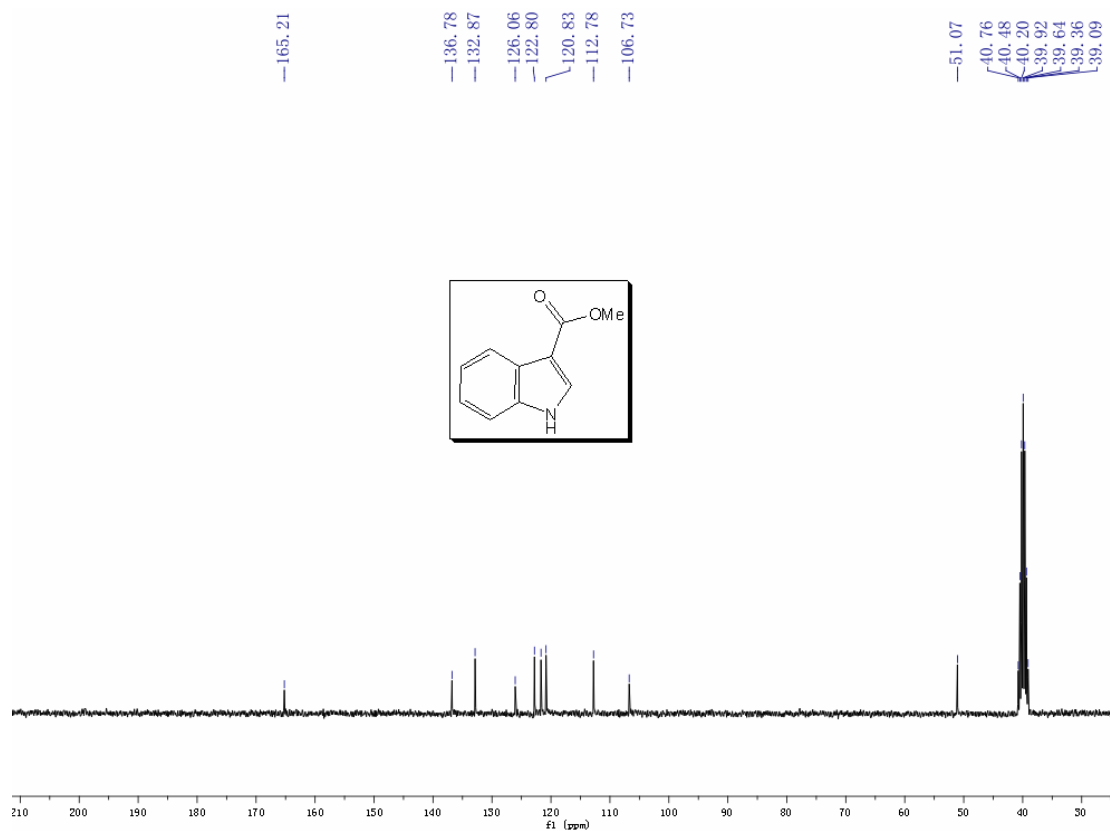

12:

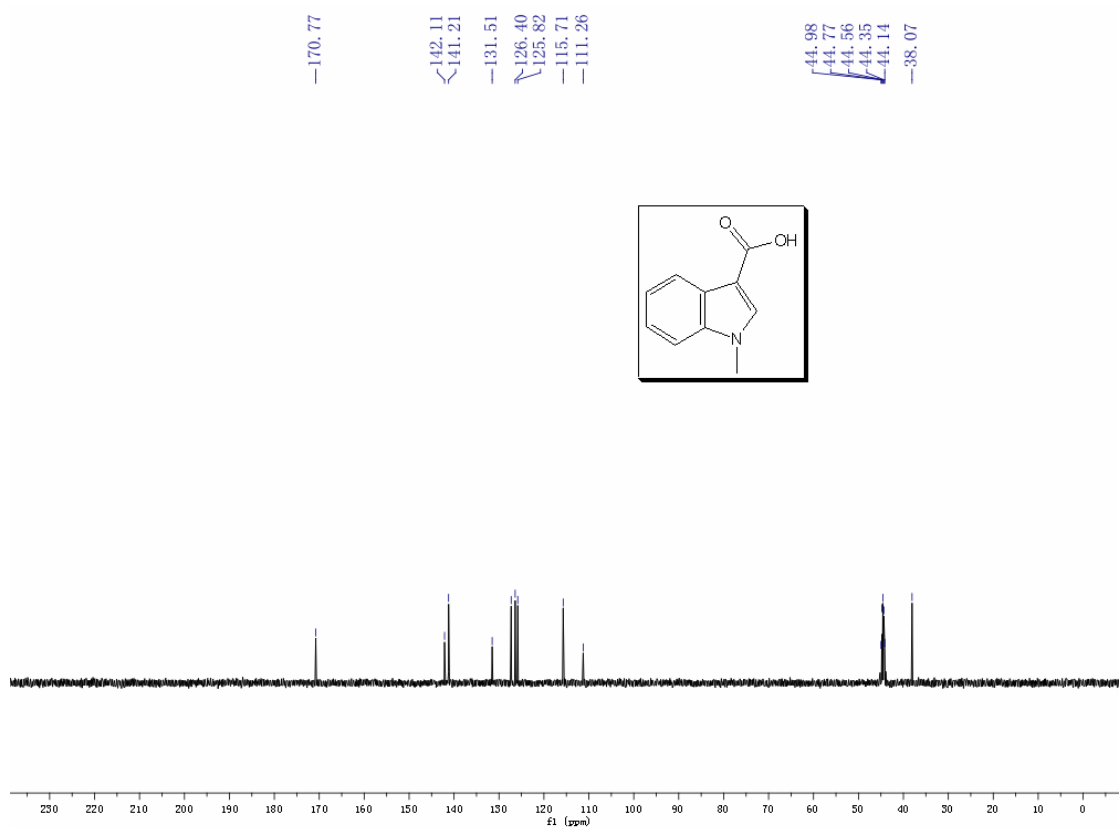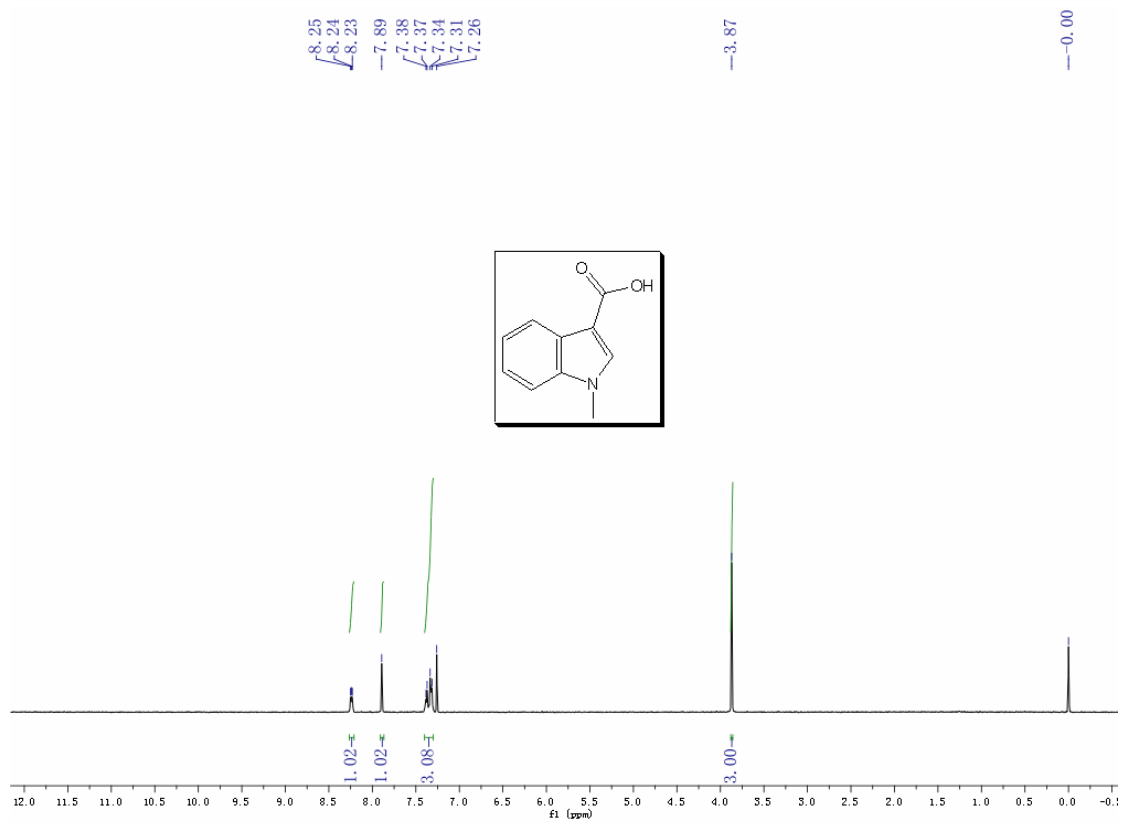

13:

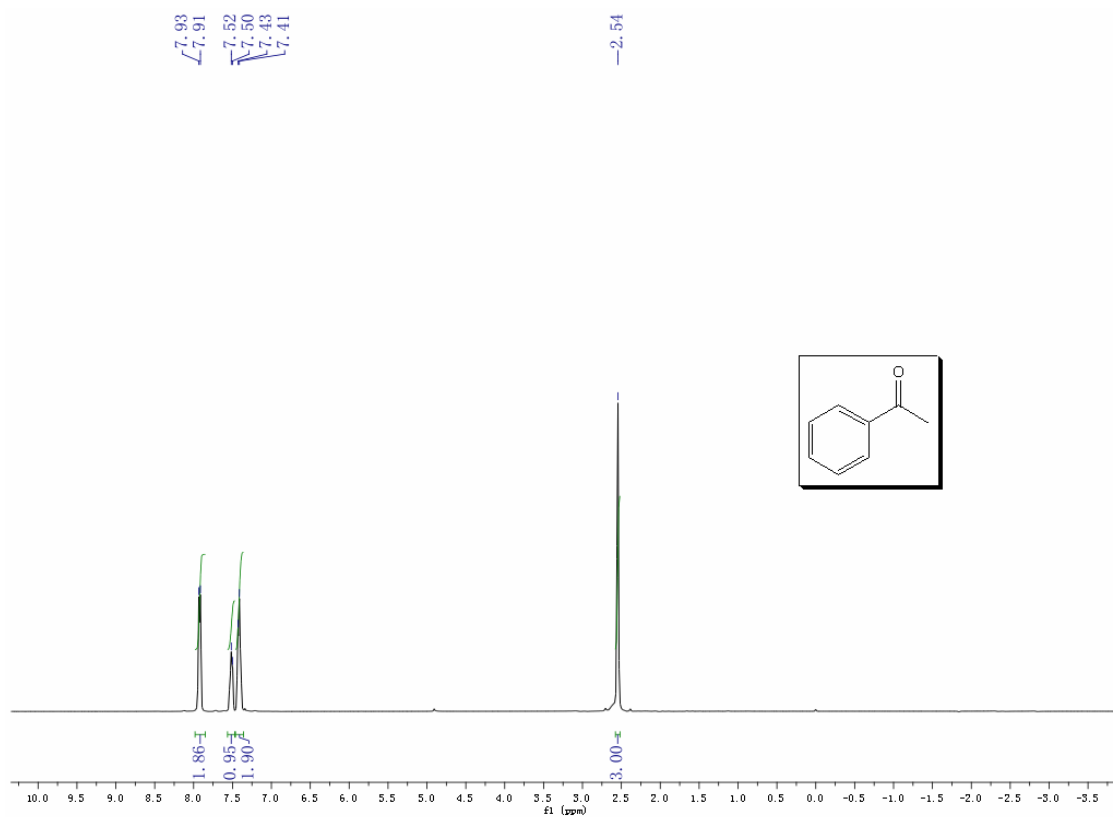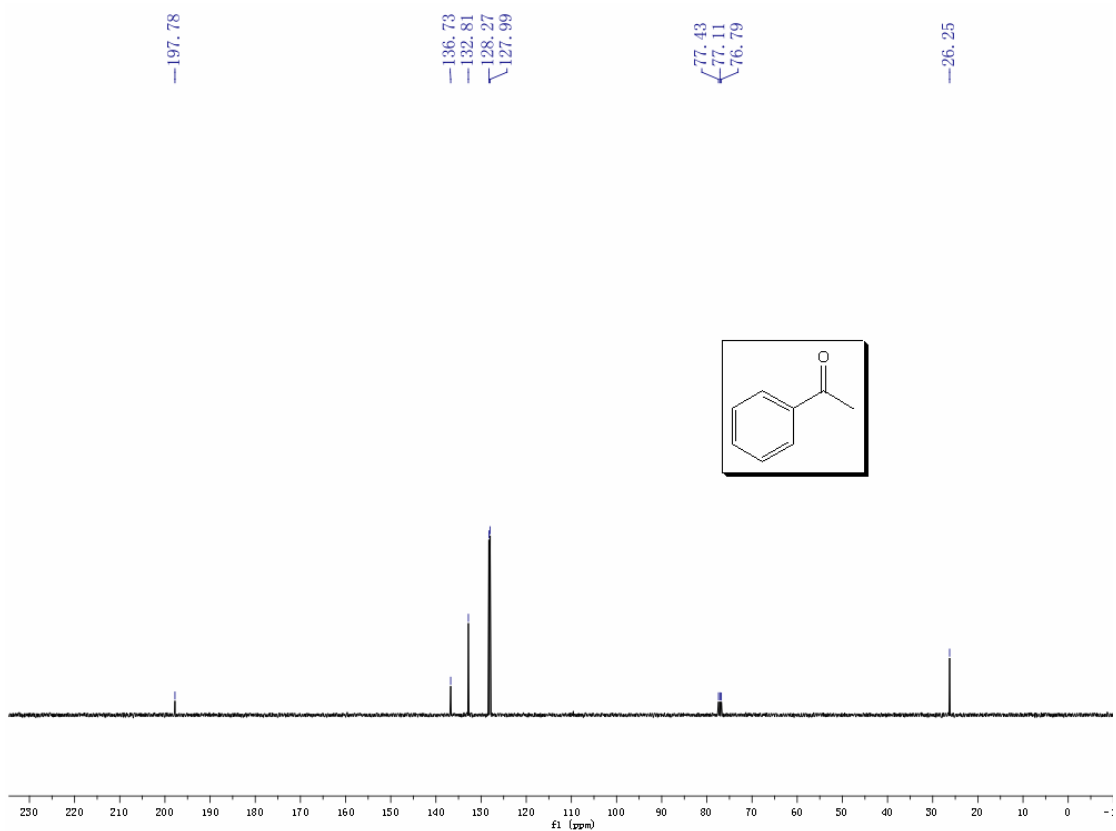

Supplement: Supplementary file 1 [file 4009735]
